# Supplementary material for: mRNA Expression Profiles from Whole Blood Associated with Vasospasm in Patients with Subarachnoid Hemorrhage
Source: Springer Nature journal article supplement (doi:10.1007/s12028-019-00861-x), 2019-10-08
Supplement: MOESM1 [file 17250820]

| Gene Symbol | Transcript Cluster ID | p-value (Vasospasm vs. No vasospasm) |
|-------------|-----------------------|--------------------------------------|
| ZMAT4       | 3132616               | 9.69E-05                             |
| OR2D3       | 3318982               | 4.07E-04                             |
| MGC39372    | 2939014               | 5.78E-04                             |
| RGS18       | 2372719               | 9.26E-04                             |
| ALDH3B2     | 3379091               | 1.41E-03                             |
| MAGOHB      | 3444195               | 1.73E-03                             |
| ST6GALNAC3  | 2342738               | 1.87E-03                             |
| ZNF519      | 3800165               | 1.90E-03                             |
| ZNF493      | 3826601               | 1.97E-03                             |
| NCRNA00164  | 2576788               | 2.18E-03                             |
| PPA2        | 2780522               | 2.38E-03                             |
| ZNF417      | 3872521               | 2.48E-03                             |
| LOC84740    | 2717481               | 3.28E-03                             |
| KLK1        | 3868681               | 3.39E-03                             |
| CHN1        | 2587961               | 3.60E-03                             |
|             | 3511158               | 3.62E-03                             |
| RBM12B      | 3144760               | 3.63E-03                             |
| OR10S1      | 3395811               | 3.66E-03                             |
| ELMOD2      | 2745067               | 3.79E-03                             |
| CLK1        | 2594497               | 3.81E-03                             |
| ALOX12      | 3708160               | 4.01E-03                             |
| HOXB1       | 3761274               | 4.10E-03                             |
| TLR10       | 2766192               | 4.19E-03                             |
| APOB48R     | 3686635               | 4.21E-03                             |
| FLJ39739    | 2433605               | 4.33E-03                             |
| ZNF107      | 3004628               | 4.36E-03                             |
| ZNF611      | 3869714               | 4.37E-03                             |
| PSG9        | 3864286               | 4.60E-03                             |
| OR10K2      | 2439314               | 4.63E-03                             |
| LOC728212   | 3937967               | 5.00E-03                             |
| ATL2        | 2548776               | 5.13E-03                             |
| ODF2L       | 2421121               | 6.03E-03                             |
| IFNA5       | 3201255               | 6.09E-03                             |
| C21orf66    | 3929395               | 6.18E-03                             |
| ZNF419      | 3843275               | 6.25E-03                             |
| ACTA2       | 3299504               | 6.29E-03                             |
| ZMAT1       | 4016001               | 6.53E-03                             |
|             | 3335640               | 6.66E-03                             |
| OR52M1      | 3318141               | 8.08E-03                             |
| ZNF260      | 3860491               | 8.62E-03                             |
| ZNF20       | 3851250               | 8.72E-03                             |
| ARL17P1     | 3760268               | 8.80E-03                             |
| CBR4        | 2793054               | 8.88E-03                             |
| ZNF141      | 2713950               | 8.98E-03                             |
|             | 3430125               | 9.26E-03                             |
| CAPZA3      | 3407016               | 9.29E-03                             |

|           |         |          |
|-----------|---------|----------|
| KATNA1    | 2978957 | 9.44E-03 |
| OR6V1     | 3028923 | 9.47E-03 |
| TAAR6     | 2926147 | 9.70E-03 |
| HOOK1     | 2338625 | 9.70E-03 |
| POLG2     | 3766861 | 9.81E-03 |
| SPINK5L2  | 2834574 | 1.01E-02 |
| ATP6V0A1  | 3721718 | 1.02E-02 |
| ARHGAP12  | 3283920 | 1.03E-02 |
| PHOSPHO2  | 2514497 | 1.04E-02 |
| TAF7      | 2878622 | 1.04E-02 |
| ZBED5     | 3362934 | 1.08E-02 |
| ZNF226    | 3835494 | 1.08E-02 |
| LRRC6     | 3154136 | 1.10E-02 |
| ZNF180    | 3864921 | 1.11E-02 |
| PLEKHF2   | 3107828 | 1.13E-02 |
| KRR1      | 3462693 | 1.16E-02 |
|           | 2763154 | 1.18E-02 |
| PIBF1     | 3493448 | 1.20E-02 |
| CCRL2     | 4047185 | 1.22E-02 |
| ERV3      | 3053380 | 1.23E-02 |
| PMS1      | 2519981 | 1.27E-02 |
| MUT       | 2956438 | 1.27E-02 |
| ZNF585A   | 3860737 | 1.30E-02 |
| LOC133874 | 2840238 | 1.32E-02 |
| WDR75     | 2519756 | 1.34E-02 |
| H2BFXP    | 3985774 | 1.35E-02 |
| ABAT      | 3647421 | 1.37E-02 |
| FTHL3P    | 2545841 | 1.40E-02 |
| FAM122C   | 3991814 | 1.45E-02 |
|           | 3335793 | 1.45E-02 |
| ZFAND5    | 3209623 | 1.48E-02 |
| OR13J1    | 3204987 | 1.49E-02 |
| LOC84931  | 2573326 | 1.53E-02 |
| GORAB     | 2366753 | 1.58E-02 |
| SENP7     | 2686646 | 1.59E-02 |
| TSGA10    | 2566586 | 1.61E-02 |
| GOLGA8B   | 3617574 | 1.62E-02 |
| SLC35A5   | 2636185 | 1.62E-02 |
| AKR1A1    | 2334374 | 1.62E-02 |
| MGAT4A    | 2566414 | 1.64E-02 |
| SH3YL1    | 2537109 | 1.65E-02 |
| SNRPN     | 3584728 | 1.67E-02 |
| RABGGTB   | 2342624 | 1.68E-02 |
| UTP15     | 2815455 | 1.68E-02 |
| ZNF701    | 3840372 | 1.70E-02 |
| TIGD1     | 2603897 | 1.71E-02 |
| LOC400713 | 3840194 | 1.72E-02 |

|           |         |          |
|-----------|---------|----------|
| POLI      | 3788833 | 1.75E-02 |
| C3orf63   | 2677653 | 1.76E-02 |
| FASTKD3   | 2847710 | 1.77E-02 |
| BHLHA15   | 3014227 | 1.78E-02 |
| ERO1LB    | 2462329 | 1.78E-02 |
| SCFD1     | 3531032 | 1.80E-02 |
| PSMA3     | 3537747 | 1.81E-02 |
| PIGH      | 3569339 | 1.83E-02 |
| STOX1     | 3249978 | 1.83E-02 |
| BLOC1S2   | 3303392 | 1.84E-02 |
| LYRM7     | 2828135 | 1.85E-02 |
| MRPL13    | 3150797 | 1.88E-02 |
| DRAM2     | 2427720 | 1.92E-02 |
| NAT5      | 3878934 | 1.94E-02 |
| CCDC53    | 3468225 | 1.95E-02 |
| MPO       | 3764245 | 1.95E-02 |
| ANKRA2    | 2862380 | 1.96E-02 |
| TRNT1     | 2608156 | 1.99E-02 |
| MTFR1     | 3101385 | 2.01E-02 |
| BMS1      | 3938817 | 2.02E-02 |
|           | 2412222 | 2.03E-02 |
|           | 2333667 | 2.04E-02 |
| HIST1H3F  | 2946364 | 2.07E-02 |
| EBPL      | 3513856 | 2.07E-02 |
| MAD2L1    | 2783715 | 2.07E-02 |
| UACA      | 3631397 | 2.08E-02 |
| ZNF267    | 3657367 | 2.10E-02 |
| XKR6      | 3124333 | 2.12E-02 |
| ZNF654    | 2632036 | 2.14E-02 |
| CWF19L2   | 3389745 | 2.15E-02 |
| FLJ30679  | 3672640 | 2.15E-02 |
| KRTAP4-12 | 3756750 | 2.15E-02 |
| TTC14     | 2654306 | 2.18E-02 |
| C1GALT1C1 | 4019967 | 2.25E-02 |
| ZNF83     | 3869650 | 2.27E-02 |
| MFN1      | 2653932 | 2.27E-02 |
|           | 3831272 | 2.28E-02 |
|           | 2969796 | 2.29E-02 |
| ESCO1     | 3800779 | 2.31E-02 |
| CCDC126   | 2992963 | 2.33E-02 |
| HOXD12    | 2516793 | 2.34E-02 |
| C4orf27   | 2793310 | 2.36E-02 |
| ZNF26     | 3439063 | 2.38E-02 |
| LYPLAL1   | 2380785 | 2.41E-02 |
| ANKRD32   | 2820622 | 2.44E-02 |
| HACL1     | 2664395 | 2.47E-02 |
| THAP6     | 2731757 | 2.47E-02 |

|            |         |          |
|------------|---------|----------|
| HEATR1     | 2462511 | 2.47E-02 |
| PRPF39     | 3534201 | 2.49E-02 |
| ESF1       | 3898224 | 2.50E-02 |
| BNIP3      | 3314040 | 2.53E-02 |
|            | 3958267 | 2.54E-02 |
| METTL10    | 3311342 | 2.54E-02 |
| AHI1       | 2975385 | 2.54E-02 |
| RPL5       | 2346863 | 2.57E-02 |
| LY96       | 3103523 | 2.63E-02 |
| CENPQ      | 2909723 | 2.65E-02 |
| C1orf103   | 2427688 | 2.67E-02 |
| NCRNA00201 | 2464484 | 2.69E-02 |
| ZNF718     | 2713837 | 2.70E-02 |
| ZNF841     | 3869396 | 2.71E-02 |
| NEK1       | 2793221 | 2.71E-02 |
| TMEM161B   | 2866045 | 2.72E-02 |
| TMEM168    | 3068476 | 2.73E-02 |
| ZNF514     | 2564634 | 2.75E-02 |
| TOMM7      | 3041260 | 2.75E-02 |
| ZNF528     | 3840224 | 2.75E-02 |
| PACS2      | 3554622 | 2.81E-02 |
| GSTM1      | 2350981 | 2.81E-02 |
| PPA1       | 3293280 | 2.85E-02 |
| CALML6     | 2316218 | 2.85E-02 |
|            | 2446358 | 2.88E-02 |
| NCBP2      | 2713074 | 2.90E-02 |
| ELP2       | 3784727 | 2.92E-02 |
| KRTAP2-4   | 3756723 | 2.92E-02 |
| PUS3       | 3396736 | 2.93E-02 |
| TTC30B     | 2588965 | 2.93E-02 |
| NOC3L      | 3301011 | 2.96E-02 |
| SPRR2A     | 2435858 | 2.99E-02 |
| GSTM2      | 2350952 | 3.00E-02 |
| ZMYM5      | 3504054 | 3.04E-02 |
| CCDC109B   | 2739160 | 3.05E-02 |
| IFT80      | 2703133 | 3.05E-02 |
| ZNF431     | 3826504 | 3.06E-02 |
| ZNF277     | 3019401 | 3.07E-02 |
| DCUN1D5    | 3388914 | 3.08E-02 |
| SH2D1A     | 3989826 | 3.10E-02 |
| FLJ38379   | 2536965 | 3.11E-02 |
| EFHA1      | 3504791 | 3.11E-02 |
| INADL      | 2339139 | 3.12E-02 |
| ZNF253     | 3826041 | 3.13E-02 |
| NIPSNAP3A  | 3182957 | 3.16E-02 |
| OR10A4     | 3318976 | 3.19E-02 |
| GIN1       | 2869275 | 3.21E-02 |

|           |         |          |
|-----------|---------|----------|
| CEP135    | 2727976 | 3.22E-02 |
| TCF7L2    | 3264621 | 3.23E-02 |
| PRR23C    | 2697721 | 3.29E-02 |
| ZNF273    | 3004768 | 3.31E-02 |
| SRFBP1    | 2826064 | 3.32E-02 |
| ZNF721    | 2756404 | 3.37E-02 |
| ACADSB    | 3268588 | 3.37E-02 |
| HSPB11    | 2413519 | 3.38E-02 |
| SKAP1     | 3761164 | 3.41E-02 |
| IGSF9B    | 3399456 | 3.43E-02 |
| EIF4H     | 3008144 | 3.44E-02 |
| LYRM5     | 3408573 | 3.45E-02 |
| MRPS33    | 3076489 | 3.45E-02 |
| LUC7L3    | 3726772 | 3.49E-02 |
|           | 2437554 | 3.52E-02 |
| XRCC4     | 2818454 | 3.52E-02 |
| TRMT61B   | 2546285 | 3.53E-02 |
|           | 3874584 | 3.53E-02 |
| NPBWR1    | 3098213 | 3.53E-02 |
| ANAPC10   | 2788143 | 3.54E-02 |
| PPP1R2    | 2712147 | 3.55E-02 |
| LSM8      | 3020804 | 3.56E-02 |
| C19orf59  | 3819088 | 3.58E-02 |
| GPR171    | 2701018 | 3.61E-02 |
| MRPL42    | 3426215 | 3.62E-02 |
| INPP4B    | 2787459 | 3.63E-02 |
|           | 2464129 | 3.64E-02 |
| MRPS31    | 3510925 | 3.64E-02 |
| ATF1      | 3414695 | 3.64E-02 |
| RPAP2     | 2346738 | 3.66E-02 |
| ORMDL1    | 2591942 | 3.69E-02 |
| C7orf23   | 3060051 | 3.69E-02 |
| NBPF22P   | 2818884 | 3.74E-02 |
| FKSG83    | 2899874 | 3.75E-02 |
| NARG2     | 3627363 | 3.78E-02 |
| PHF10     | 2986084 | 3.81E-02 |
| PYGO1     | 3625440 | 3.85E-02 |
| MYNN      | 2651671 | 3.86E-02 |
| ZNF461    | 3860596 | 3.87E-02 |
| ERGIC2    | 3448975 | 3.90E-02 |
|           | 2869558 | 3.90E-02 |
| KRTAP26-1 | 3928477 | 3.92E-02 |
| TXNDC9    | 2566740 | 3.93E-02 |
| CBR3      | 3919834 | 3.93E-02 |
| ARHGAP15  | 2508611 | 3.96E-02 |
| USP1      | 2339414 | 3.98E-02 |
| GKAP1     | 3212189 | 4.02E-02 |

|           |         |          |
|-----------|---------|----------|
| REEP3     | 3249043 | 4.05E-02 |
| TAS2R1    | 2848118 | 4.09E-02 |
| TTC37     | 2867693 | 4.10E-02 |
| KIAA1586  | 2911257 | 4.14E-02 |
| ACADM     | 2342576 | 4.16E-02 |
|           | 3184925 | 4.22E-02 |
| CCDC23    | 2409069 | 4.23E-02 |
| C8orf38   | 3107724 | 4.25E-02 |
| PDCD10    | 2704188 | 4.27E-02 |
| KPNA5     | 2922840 | 4.28E-02 |
| NUDCD1    | 3148796 | 4.29E-02 |
| LPAR6     | 3513514 | 4.30E-02 |
|           | 2901698 | 4.31E-02 |
| CCDC82    | 3387771 | 4.33E-02 |
| EEF1E1    | 2940920 | 4.33E-02 |
| TMEM14A   | 2910364 | 4.34E-02 |
| KRTAP19-1 | 3928522 | 4.38E-02 |
| C7orf36   | 2998333 | 4.40E-02 |
| STX3      | 3332131 | 4.40E-02 |
| ITGB3BP   | 2416218 | 4.43E-02 |
| KIAA1147  | 3076753 | 4.45E-02 |
| CSTA      | 2638869 | 4.49E-02 |
| SMARCAD1  | 2736259 | 4.52E-02 |
| ATP6V1C1  | 3110171 | 4.54E-02 |
| TRAT1     | 2635349 | 4.55E-02 |
| SLC25A36  | 2645275 | 4.64E-02 |
| NMD3      | 2650538 | 4.67E-02 |
| ZNHIT3    | 3719112 | 4.71E-02 |
| PPIG      | 2514441 | 4.72E-02 |
| OR4C12    | 3373046 | 4.74E-02 |
| NEK2      | 2454444 | 4.80E-02 |
| PIGK      | 2418929 | 4.81E-02 |
| NAE1      | 3695268 | 4.82E-02 |
| CSNK1G3   | 2826550 | 4.82E-02 |
| LAIR2     | 3841506 | 4.84E-02 |
| ATP5L     | 3351359 | 4.84E-02 |
| USPL1     | 3484005 | 4.86E-02 |
| UBA3      | 2681195 | 4.86E-02 |
| TTC39B    | 3199662 | 4.89E-02 |
| ZNF644    | 2422517 | 4.93E-02 |
| COX16     | 3570454 | 4.95E-02 |
| ZNF627    | 3821301 | 4.97E-02 |

**Fold-Change (Vasospasm vs. No vasospasm)**

-1.22  
-1.37  
1.32  
1.32  
-1.24  
1.37  
1.25  
1.29  
1.32  
-1.40  
1.20  
1.42  
-1.26  
-1.22  
1.23  
1.56  
1.26  
-1.21  
1.36  
1.37  
-1.27  
-1.23  
1.34  
-1.44  
1.38  
1.36  
1.23  
-1.24  
-1.20  
-1.45  
1.21  
1.29  
-1.28  
1.43  
1.25  
-1.22  
1.38  
1.66  
-1.26  
1.24  
1.24  
1.58  
1.31  
1.43  
1.28  
-1.24

1.20  
-1.22  
1.44  
1.25  
1.25  
-1.21  
-1.36  
1.20  
1.38  
1.32  
1.39  
1.29  
1.62  
1.29  
1.38  
1.23  
-1.21  
1.35  
-1.27  
1.51  
1.26  
1.23  
1.20  
1.28  
1.31  
1.28  
-1.23  
1.22  
1.22  
-1.35  
1.21  
-1.33  
-1.22  
1.23  
1.21  
1.27  
1.49  
1.22  
-1.23  
1.25  
1.27  
1.56  
1.31  
1.24  
1.25  
1.48  
1.28



1.22  
1.32  
1.30  
-1.22  
1.21  
1.27  
1.20  
1.51  
-1.20  
1.22  
1.49  
1.21  
1.22  
1.21  
1.27  
-1.26  
1.26  
1.22  
1.23  
1.30  
1.28  
-1.47  
-1.20  
-1.22  
1.40  
1.27  
1.27  
1.26  
1.24  
1.22  
-1.20  
-1.42  
1.29  
1.21  
1.30  
1.22  
1.35  
1.22  
1.21  
1.23  
-1.22  
1.33  
1.21  
1.27  
1.27  
1.20  
1.25

1.23  
1.21  
1.28  
1.45  
1.33  
1.20  
1.20  
1.23  
1.49  
1.21  
1.25  
1.22  
1.25  
1.27  
1.20  
1.27  
1.22  
1.24  
1.25  
1.27  
-1.21  
-1.41  
1.25  
-1.21  
-1.21  
1.22  
1.20  
-1.23  
1.22  
1.22  
1.28  
-1.25  
-1.32  
1.22  
1.34  
1.22  
1.23  
1.24  
1.20  
1.23  
1.25  
1.21  
1.22  
1.28  
1.32  
-1.28  
1.27

1.24  
-1.22  
-1.31  
1.33  
1.27  
1.32  
1.23  
1.39  
1.25  
-1.24  
1.28  
1.31  
1.42  
1.20  
1.26  
1.33  
1.25  
1.22  
1.23  
1.39  
1.29  
1.40  
-1.22  
1.28  
1.22  
1.24  
1.29  
1.21  
-1.23  
1.22  
1.21  
1.21  
-1.30  
-1.22  
1.22  
1.30  
-1.24  
1.27  
1.23  
1.23  
-1.22  
-1.21  
1.25  
1.30  
1.20  
1.24  
1.30

1.32  
1.22  
1.21  
1.30  
1.28  
1.24  
-1.35  
1.21  
1.35  
1.28  
1.25  
1.36  
-1.32  
1.27  
1.33  
1.21  
-1.25  
1.29  
-1.27  
1.32  
1.41  
1.30  
1.24  
1.20  
1.34  
1.24  
1.25  
1.20  
1.21  
-1.22  
-1.22  
1.29  
1.24  
1.24  
-1.71  
1.33  
1.22  
1.22  
1.21  
1.23  
1.35  
1.20
