# Supplementary material for: mRNA Expression Profiles from Whole Blood Associated with Vasospasm in Patients with Subarachnoid Hemorrhage
Source: Springer Nature journal article supplement (doi:10.1007/s12028-019-00861-x), 2019-10-08
Supplement: MOESM2 [file 17250820]

| Gene Symbol | transcript_cluster_id | Probeset ID | p-value (Vasospasm vs. No vasospasm) |
|-------------|-----------------------|-------------|--------------------------------------|
| LMO1        | 3361672               | 3361727     | 2.49E-05                             |
| GLDN        | 3593931               | 3593961     | 5.16E-05                             |
| HOXB6       | 3761395               | 3761398     | 5.51E-05                             |
| ESPL1       | 3415857               | 3415861     | 5.61E-05                             |
| DNAH10      | 3436117               | 3436158     | 6.05E-05                             |
| PHOX2B      | 2767159               | 2767171     | 6.19E-05                             |
| SGTA        | 3846011               | 3846013     | 6.21E-05                             |
| FAM55C      | 2634058               | 2634063     | 6.42E-05                             |
| MGC2752     | 3844297               | 3844299     | 7.63E-05                             |
| RAB11FIP3   | 3642875               | 3642881     | 8.92E-05                             |
| C5orf38     | 2799509               | 2799510     | 9.13E-05                             |
| KRT25       | 3756447               | 3756461     | 9.80E-05                             |
| CSNK1G1     | 3629012               | 3629055     | 9.97E-05                             |
| CDH15       | 3673892               | 3673906     | 1.06E-04                             |
| ABCA7       | 3815416               | 3815489     | 1.12E-04                             |
| IL24        | 2377035               | 2377050     | 1.27E-04                             |
| PPM1F       | 3954294               | 3954298     | 1.38E-04                             |
| ECD         | 3294242               | 3294264     | 1.43E-04                             |
| ARHGEF2     | 2437801               | 2437837     | 1.52E-04                             |
| E2F1        | 3903146               | 3903157     | 1.53E-04                             |
| TEX13B      | 4017501               | 4017506     | 1.58E-04                             |
| TMEM67      | 3107242               | 3107263     | 1.65E-04                             |
| CBFA2T2     | 3882533               | 3882603     | 1.66E-04                             |
| PPP2R4      | 3190939               | 3190968     | 1.87E-04                             |
| CLN6        | 3630701               | 3630716     | 1.90E-04                             |
| NT5C3L      | 3757399               | 3757420     | 1.92E-04                             |
| EXT1        | 3150060               | 3150162     | 1.99E-04                             |
| AKR7L       | 2399687               | 2399700     | 2.13E-04                             |
| HRC         | 3867708               | 3867710     | 2.13E-04                             |
| POLR3H      | 3961981               | 3961989     | 2.15E-04                             |
| GIT1        | 3751541               | 3751569     | 2.22E-04                             |
| MYOM1       | 3796428               | 3796507     | 2.31E-04                             |
|             | 4053986               | 4053993     | 2.37E-04                             |
| ACACB       | 3430959               | 3431035     | 2.47E-04                             |
| GRASP       | 3415193               | 3415211     | 2.47E-04                             |
| ProSAPiP1   | 3895274               | 3895286     | 2.47E-04                             |
| C1orf127    | 2396362               | 2396373     | 2.54E-04                             |
| NR5A2       | 2374126               | 2374165     | 2.56E-04                             |
| UGGT2       | 3521484               | 3521601     | 2.59E-04                             |
| ORC5L       | 3065963               | 3065969     | 2.64E-04                             |
| ADAM7       | 3090326               | 3090337     | 2.70E-04                             |
| PDE2A       | 3381150               | 3381160     | 2.70E-04                             |
| NPR2        | 3168160               | 3168187     | 2.70E-04                             |
| PRPH        | 3413852               | 3413858     | 2.72E-04                             |
| DNAH3       | 3683879               | 3683918     | 2.75E-04                             |
| FBXL4       | 2966078               | 2966124     | 2.83E-04                             |

|           |         |         |          |
|-----------|---------|---------|----------|
| RPTOR     | 3737488 | 3737627 | 2.85E-04 |
| MYO1C     | 3740201 | 3740232 | 2.92E-04 |
| BATF      | 3544605 | 3544623 | 2.95E-04 |
| DACT2     | 2985497 | 2985513 | 2.98E-04 |
|           | 2867145 | 2867206 | 3.09E-04 |
| EVC2      | 2758978 | 2759034 | 3.16E-04 |
| KPTN      | 3866579 | 3866594 | 3.18E-04 |
| LACRT     | 3456878 | 3456879 | 3.28E-04 |
| SPOCK3    | 2792647 | 2792670 | 3.29E-04 |
| CHD9      | 3660858 | 3661003 | 3.29E-04 |
| CEP135    | 2727976 | 2727994 | 3.33E-04 |
| CCDC85B   | 3335719 | 3335725 | 3.34E-04 |
| PIBF1     | 3493448 | 3493520 | 3.40E-04 |
| PSIP1     | 3199790 | 3199820 | 3.43E-04 |
| GPR35     | 2535927 | 2535931 | 3.51E-04 |
| SLC15A1   | 3522327 | 3522374 | 3.54E-04 |
| AKAP14    | 3989006 | 3989009 | 3.60E-04 |
| KIF22     | 3655628 | 3655630 | 3.73E-04 |
| SNAI1     | 3888522 | 3888529 | 3.76E-04 |
| PTPRF     | 2333318 | 2333344 | 3.76E-04 |
| GMPPA     | 2528620 | 2528635 | 3.80E-04 |
| PHACTR3   | 3891530 | 3891600 | 3.87E-04 |
| HSPA14    | 3236395 | 3236436 | 3.89E-04 |
| SPSB3     | 3676134 | 3676136 | 3.89E-04 |
| INTS8     | 3107661 | 3107704 | 3.93E-04 |
| IDH3G     | 4026722 | 4026736 | 3.93E-04 |
| PPA2      | 2780522 | 2780593 | 3.95E-04 |
| FAM122C   | 3991814 | 3991834 | 3.96E-04 |
| SLC28A3   | 3212420 | 3212442 | 4.01E-04 |
| C20orf196 | 3875108 | 3875157 | 4.09E-04 |
| NR1H2     | 3839276 | 3839299 | 4.17E-04 |
| C8orf44   | 3101765 | 3101781 | 4.27E-04 |
| GPR126    | 2928461 | 2928529 | 4.33E-04 |
| ATP2C1    | 2642325 | 2642388 | 4.35E-04 |
| SMOC1     | 3542275 | 3542354 | 4.36E-04 |
| FAM134C   | 3757990 | 3758006 | 4.39E-04 |
| NEB       | 2581000 | 2581017 | 4.42E-04 |
| SLC12A8   | 2693014 | 2693025 | 4.46E-04 |
| ZFYVE21   | 3553947 | 3553953 | 4.53E-04 |
| MRPL17    | 3361116 | 3361129 | 4.59E-04 |
| SRGAP3    | 2662087 | 2662104 | 4.59E-04 |
| CDC42BPB  | 3580498 | 3580524 | 4.60E-04 |
| SH2D1A    | 3989826 | 3989844 | 4.67E-04 |
| DDR2      | 2364231 | 2364285 | 4.69E-04 |
| C1orf66   | 2361697 | 2361710 | 4.71E-04 |
| ITPR2     | 3448152 | 3448325 | 4.74E-04 |
| ZNF397    | 3784468 | 3784495 | 4.77E-04 |

|               |         |         |          |
|---------------|---------|---------|----------|
| ZNF266        | 3849688 | 3849692 | 4.81E-04 |
| GANAB         | 3375951 | 3375966 | 4.85E-04 |
| FLJ34690      | 3710804 | 3710806 | 4.85E-04 |
| KNTC1         | 3435362 | 3435388 | 4.97E-04 |
| DENND4A       | 3629811 | 3629860 | 5.00E-04 |
| ZNF236        | 3794458 | 3794540 | 5.04E-04 |
| DNAJB7        | 3961699 | 3961700 | 5.37E-04 |
| SIM2          | 3920171 | 3920213 | 5.39E-04 |
| SH3BGR        | 3921442 | 3921449 | 5.41E-04 |
| CACNA1B       | 3195568 | 3195661 | 5.43E-04 |
| NUBPL         | 3531355 | 3531358 | 5.44E-04 |
| TLL1          | 2750753 | 2750760 | 5.53E-04 |
| PAR3B         | 2524016 | 2524018 | 5.57E-04 |
| NKX2-1        | 3561381 | 3561412 | 5.64E-04 |
| MAGI2         | 3058209 | 3058245 | 5.72E-04 |
| RCAN1         | 3930235 | 3930278 | 5.73E-04 |
| SLC17A8       | 3428190 | 3428202 | 5.75E-04 |
| RP13-102H20.1 | 3990927 | 3990942 | 5.84E-04 |
| COL17A1       | 3305081 | 3305086 | 5.87E-04 |
| LAMA5         | 3913018 | 3913111 | 5.90E-04 |
| TRO           | 3978579 | 3978594 | 5.96E-04 |
| TNS1          | 2599153 | 2599246 | 5.97E-04 |
| UBR3          | 2514658 | 2514714 | 6.00E-04 |
| C3            | 3848039 | 3848043 | 6.04E-04 |
| 4-Sep         | 3764527 | 3764559 | 6.05E-04 |
| IRX1          | 2799758 | 2799776 | 6.06E-04 |
| GRIN2D        | 3837759 | 3837781 | 6.14E-04 |
| LNX2          | 3507003 | 3507015 | 6.17E-04 |
| AKNA          | 3221916 | 3221970 | 6.19E-04 |
| RAPH1         | 2595560 | 2595573 | 6.29E-04 |
| TMEM132D      | 3478068 | 3478151 | 6.30E-04 |
| ALS2CR8       | 2523419 | 2523447 | 6.36E-04 |
| ZMAT4         | 3132616 | 3132697 | 6.38E-04 |
| VARS          | 2949380 | 2949411 | 6.39E-04 |
| FASN          | 3774635 | 3774666 | 6.43E-04 |
| ABCA3         | 3676763 | 3676822 | 6.43E-04 |
| MTRF1         | 3101385 | 3101397 | 6.55E-04 |
| STAG3L4       | 3006133 | 3006147 | 6.63E-04 |
| METRN         | 3643333 | 3643337 | 6.74E-04 |
| CACNG7        | 3841134 | 3841148 | 6.75E-04 |
| SPPL2B        | 3816424 | 3816457 | 6.85E-04 |
| POU2F2        | 3863435 | 3863450 | 6.93E-04 |
| CENPE         | 2780172 | 2780219 | 6.98E-04 |
| GPR177        | 2417390 | 2417401 | 7.02E-04 |
| SCGB3A1       | 2890741 | 2890755 | 7.05E-04 |
| CNDP2         | 3793760 | 3793782 | 7.10E-04 |
| NEGR1         | 2418078 | 2418080 | 7.12E-04 |

|               |         |         |          |
|---------------|---------|---------|----------|
| DTNBP1        | 2943236 | 2943246 | 7.16E-04 |
| RNF17         | 3482017 | 3482024 | 7.33E-04 |
| MKKNK2        | 3845647 | 3845664 | 7.38E-04 |
| METTTL5       | 2586348 | 2586369 | 7.40E-04 |
| ANK3          | 3290875 | 3291019 | 7.44E-04 |
| C5orf33       | 2853388 | 2853395 | 7.45E-04 |
| CLK1          | 2594497 | 2594510 | 7.47E-04 |
| ADAMTSL1      | 3163982 | 3164038 | 7.48E-04 |
| TRRAP         | 3014411 | 3014412 | 7.52E-04 |
| RICH2         | 3710870 | 3710873 | 7.72E-04 |
| UGT1A10       | 2533019 | 2533039 | 7.73E-04 |
| INPP5K        | 3740264 | 3740272 | 7.78E-04 |
| CASK          | 4005859 | 4005903 | 7.80E-04 |
| GLT8D1        | 2676319 | 2676326 | 7.82E-04 |
| SENP7         | 2686646 | 2686668 | 7.84E-04 |
| KIAA1033      | 3429754 | 3429816 | 7.85E-04 |
| KDELR3        | 3945314 | 3945329 | 7.85E-04 |
| NUP210L       | 2436467 | 2436480 | 7.93E-04 |
| MGC39372      | 2939014 | 2939016 | 8.04E-04 |
| RYR1          | 3832457 | 3832585 | 8.05E-04 |
| SUMF1         | 2660800 | 2660889 | 8.06E-04 |
| SCLY          | 2534615 | 2534619 | 8.09E-04 |
| TP53BP1       | 3621194 | 3621208 | 8.10E-04 |
| TRPM1         | 3616044 | 3616045 | 8.14E-04 |
| PLCB4         | 3875908 | 3875943 | 8.16E-04 |
| C20orf103     | 3876084 | 3876093 | 8.19E-04 |
| PLXNB1        | 2673181 | 2673201 | 8.22E-04 |
| COL12A1       | 2961177 | 2961257 | 8.24E-04 |
| KRT85         | 3455309 | 3455324 | 8.32E-04 |
| SLC12A3       | 3662333 | 3662359 | 8.34E-04 |
| LARS          | 2879927 | 2879970 | 8.34E-04 |
| C3orf64       | 2681114 | 2681126 | 8.56E-04 |
| PROM2         | 2493943 | 2493964 | 8.57E-04 |
| LOC84931      | 2573326 | 2573330 | 8.59E-04 |
| PKN1          | 3822723 | 3822744 | 8.61E-04 |
| PHF8          | 4009506 | 4009527 | 8.62E-04 |
| SLC12A5       | 3887241 | 3887251 | 8.68E-04 |
| C9orf68       | 3197231 | 3197247 | 8.70E-04 |
| ARAP2         | 2765590 | 2765623 | 8.79E-04 |
| MAMLD1        | 3994710 | 3994745 | 8.81E-04 |
| SLC25A32      | 3147726 | 3147782 | 8.83E-04 |
| KIAA1984      | 3194635 | 3194680 | 8.86E-04 |
| PCNXL2        | 2461037 | 2461092 | 8.99E-04 |
| RP13-102H20.1 | 3990927 | 3990951 | 9.03E-04 |
| CROCCL2       | 2398193 | 2398202 | 9.05E-04 |
| SHROOM3       | 2732068 | 2732126 | 9.09E-04 |
| C10orf79      | 3305198 | 3305226 | 9.09E-04 |

|           |         |         |          |
|-----------|---------|---------|----------|
| DHX57     | 2549007 | 2549035 | 9.11E-04 |
| ARHGAP30  | 2440549 | 2440564 | 9.20E-04 |
| LY6K      | 3119213 | 3119216 | 9.22E-04 |
| SLC2A4RG  | 3893673 | 3893691 | 9.25E-04 |
| TMC1      | 3174643 | 3174683 | 9.38E-04 |
| TLR10     | 2766192 | 2766193 | 9.39E-04 |
| ABCF3     | 2655511 | 2655512 | 9.40E-04 |
| NOTCH3    | 3853108 | 3853138 | 9.41E-04 |
| LMBR1     | 3081624 | 3081635 | 9.42E-04 |
| OTOP2     | 3734517 | 3734529 | 9.46E-04 |
| DCLRE1C   | 3278977 | 3279006 | 9.46E-04 |
| PIP5K1C   | 3846316 | 3846317 | 9.48E-04 |
| ZMYND19   | 3231157 | 3231160 | 9.50E-04 |
| RAPGEF3   | 3452690 | 3452699 | 9.54E-04 |
| DYNC1H1   | 3552847 | 3552892 | 9.57E-04 |
| ADCY6     | 3453252 | 3453253 | 9.66E-04 |
| B3GALT5   | 3921490 | 3921492 | 9.67E-04 |
| ZZEF1     | 3741875 | 3741881 | 9.71E-04 |
| TWSG1     | 3778372 | 3778373 | 9.75E-04 |
| DCBLD2    | 2686023 | 2686025 | 9.78E-04 |
| ZSCAN18   | 3872678 | 3872700 | 9.78E-04 |
| PRKAB1    | 3434142 | 3434148 | 9.81E-04 |
| ZNF267    | 3657367 | 3657378 | 9.85E-04 |
| CACNA1C   | 3400730 | 3400930 | 9.97E-04 |
| SLC5A10   | 3713627 | 3713663 | 9.98E-04 |
| RNGTT     | 2963929 | 2964002 | 1.00E-03 |
| DBH       | 3192820 | 3192879 | 1.01E-03 |
| RANBP2    | 2499158 | 2499187 | 1.02E-03 |
| BRWD1     | 3932148 | 3932158 | 1.02E-03 |
| RGS5      | 2441386 | 2441394 | 1.02E-03 |
| SCTR      | 2573112 | 2573151 | 1.02E-03 |
| TAPT1     | 2761941 | 2761947 | 1.02E-03 |
| USP5      | 3402899 | 3402901 | 1.03E-03 |
| TSGA10    | 2566586 | 2566615 | 1.03E-03 |
| ZZZ3      | 2419046 | 2419060 | 1.03E-03 |
| PDZRN4    | 3411810 | 3411878 | 1.03E-03 |
| FAM98C    | 3832435 | 3832453 | 1.03E-03 |
| REM1      | 3881261 | 3881271 | 1.04E-03 |
| MAP3K7IP2 | 2930592 | 2930649 | 1.05E-03 |
| COL4A6    | 4017538 | 4017550 | 1.05E-03 |
| ZNF180    | 3864921 | 3864922 | 1.06E-03 |
| GLT8D3    | 3451246 | 3451260 | 1.06E-03 |
| DLEC1     | 2617477 | 2617559 | 1.06E-03 |
| POLG      | 3638337 | 3638378 | 1.06E-03 |
| GDF5      | 3903952 | 3903954 | 1.06E-03 |
| C2orf84   | 2473026 | 2473078 | 1.07E-03 |
| EHD1      | 3377226 | 3377228 | 1.07E-03 |

|            |         |         |          |
|------------|---------|---------|----------|
| ATP4B      | 3526655 | 3526670 | 1.08E-03 |
| ZFYVE26    | 3569441 | 3569476 | 1.08E-03 |
| PNCK       | 4026624 | 4026635 | 1.09E-03 |
| ZNF575     | 3835085 | 3835100 | 1.09E-03 |
| BARHL1     | 3192495 | 3192503 | 1.10E-03 |
| CDC14A     | 2348896 | 2348899 | 1.11E-03 |
| ELMOD2     | 2745067 | 2745090 | 1.13E-03 |
| FAM160A2   | 3360772 | 3360784 | 1.13E-03 |
| LXN        | 2702724 | 2702733 | 1.14E-03 |
| LRRN4      | 3896594 | 3896603 | 1.14E-03 |
| VGLL3      | 2684851 | 2684853 | 1.15E-03 |
| KRT18      | 3415576 | 3415581 | 1.15E-03 |
| CYP4F22    | 3823210 | 3823217 | 1.16E-03 |
| STAR       | 3131819 | 3131836 | 1.17E-03 |
| KCNK6      | 3832292 | 3832294 | 1.17E-03 |
| BCL2       | 3811339 | 3811362 | 1.17E-03 |
| OGFR       | 3892941 | 3892964 | 1.18E-03 |
| CPAMD8     | 3854132 | 3854160 | 1.21E-03 |
| ZNF417     | 3872521 | 3872529 | 1.21E-03 |
| ABCA2      | 3230610 | 3230660 | 1.21E-03 |
| LEPRE1     | 2409004 | 2409048 | 1.22E-03 |
| TXNRD2     | 3952880 | 3952885 | 1.23E-03 |
| AP3B2      | 3636216 | 3636237 | 1.23E-03 |
| CACNA1C    | 3400730 | 3400807 | 1.23E-03 |
| IFT88      | 3480411 | 3480479 | 1.23E-03 |
| DNHD1      | 3318731 | 3318758 | 1.24E-03 |
| TMEM115    | 2675304 | 2675308 | 1.25E-03 |
| NCRNA00051 | 3119000 | 3119003 | 1.25E-03 |
| ATP5L2     | 3962560 | 3962565 | 1.25E-03 |
| LZTS2      | 3260957 | 3260965 | 1.27E-03 |
| TMC3       | 3635578 | 3635608 | 1.28E-03 |
| CAPN7      | 2612278 | 2612312 | 1.28E-03 |
| TMF1       | 2681157 | 2681186 | 1.28E-03 |
| WDR35      | 2542651 | 2542695 | 1.29E-03 |
| KCNS2      | 3108782 | 3108786 | 1.30E-03 |
| CASC1      | 3447798 | 3447816 | 1.31E-03 |
| PLSCR4     | 2699623 | 2699661 | 1.31E-03 |
| AIFM2      | 3293187 | 3293203 | 1.32E-03 |
| FUK        | 3667241 | 3667262 | 1.32E-03 |
| PDZD2      | 2805232 | 2805325 | 1.32E-03 |
| NOL6       | 3203582 | 3203608 | 1.33E-03 |
| ACRBP      | 3442150 | 3442158 | 1.33E-03 |
| NOC3L      | 3301011 | 3301030 | 1.33E-03 |
| NRXN2      | 3376914 | 3376969 | 1.33E-03 |
| C8G        | 3194969 | 3194983 | 1.33E-03 |
| RASGEF1B   | 2775259 | 2775286 | 1.34E-03 |
| ABHD8      | 3854349 | 3854351 | 1.34E-03 |

|          |         |         |          |
|----------|---------|---------|----------|
| MTSS1L   | 3697183 | 3697208 | 1.35E-03 |
| ICAM5    | 3820469 | 3820482 | 1.35E-03 |
| TNS3     | 3049522 | 3049569 | 1.36E-03 |
| SMO      | 3023350 | 3023364 | 1.38E-03 |
| LCP2     | 2886595 | 2886623 | 1.38E-03 |
| MFSD6    | 2520138 | 2520146 | 1.39E-03 |
| TRPM8    | 2533227 | 2533272 | 1.39E-03 |
| TTC39A   | 2412312 | 2412320 | 1.39E-03 |
| AARS2    | 2955118 | 2955147 | 1.39E-03 |
| FLJ43860 | 3156655 | 3156710 | 1.40E-03 |
| UNC13B   | 3167731 | 3167776 | 1.41E-03 |
| TACC2    | 3268059 | 3268161 | 1.41E-03 |
| MAPK3    | 3687494 | 3687497 | 1.41E-03 |
| BRWD1    | 3932148 | 3932159 | 1.42E-03 |
| ROBO1    | 2683763 | 2683792 | 1.42E-03 |
| SLC37A1  | 3922664 | 3922713 | 1.42E-03 |
| ESPL1    | 3415857 | 3415904 | 1.43E-03 |
| LRRC4C   | 3370269 | 3370272 | 1.43E-03 |
| APOBEC1  | 3442752 | 3442763 | 1.43E-03 |
| C6orf145 | 2939469 | 2939470 | 1.44E-03 |
| PCDHGA7  | 2832533 | 2832597 | 1.44E-03 |
| RNASE7   | 3527831 | 3527835 | 1.46E-03 |
| BTG3     | 3926080 | 3926094 | 1.47E-03 |
| MAGOHB   | 3444195 | 3444196 | 1.47E-03 |
| BRDT     | 2346575 | 2346596 | 1.48E-03 |
| KIAA1468 | 3791168 | 3791202 | 1.48E-03 |
| UMOD     | 3683549 | 3683553 | 1.48E-03 |
| SCML2    | 4001369 | 4001379 | 1.49E-03 |
| TP53I11  | 3371003 | 3371031 | 1.49E-03 |
| GGT5     | 3955185 | 3955200 | 1.49E-03 |
| CLMN     | 3577940 | 3577949 | 1.49E-03 |
| SPINK5   | 2834503 | 2834526 | 1.49E-03 |
| RYR1     | 3832457 | 3832563 | 1.49E-03 |
| HPRT1    | 3991698 | 3991716 | 1.49E-03 |
| C20orf71 | 3882369 | 3882377 | 1.50E-03 |
| RNASEL   | 2447124 | 2447134 | 1.50E-03 |
| SCYL1    | 3335267 | 3335289 | 1.51E-03 |
| GPLD1    | 2945518 | 2945546 | 1.51E-03 |
| AARS2    | 2955118 | 2955140 | 1.52E-03 |
| KIF15    | 2620256 | 2620275 | 1.52E-03 |
| ZNF7     | 3120917 | 3120951 | 1.52E-03 |
| STK32B   | 2716713 | 2716766 | 1.52E-03 |
| SPATA2L  | 3704928 | 3704932 | 1.53E-03 |
| KIAA1524 | 2687979 | 2687996 | 1.53E-03 |
| FLJ30679 | 3672640 | 3672643 | 1.53E-03 |
| WDR91    | 3074260 | 3074280 | 1.54E-03 |
| PAK6     | 3589756 | 3589772 | 1.54E-03 |

|           |         |         |          |
|-----------|---------|---------|----------|
| COL16A1   | 2404546 | 2404569 | 1.55E-03 |
| NEK1      | 2793221 | 2793239 | 1.55E-03 |
| SNTG1     | 3097701 | 3097820 | 1.55E-03 |
| MAD2L1    | 2783715 | 2783743 | 1.56E-03 |
| CCDC150   | 2521278 | 2521304 | 1.59E-03 |
| DYNC1H1   | 3552847 | 3552909 | 1.60E-03 |
| CAPN7     | 2612278 | 2612296 | 1.60E-03 |
|           | 3642200 | 3642256 | 1.60E-03 |
| SNX14     | 2963313 | 2963341 | 1.60E-03 |
| ESYT3     | 2644619 | 2644654 | 1.62E-03 |
| ZNF45     | 3864725 | 3864734 | 1.62E-03 |
| USH2A     | 2455699 | 2455708 | 1.62E-03 |
| CFP       | 4007164 | 4007176 | 1.62E-03 |
| SLC4A3    | 2528774 | 2528810 | 1.63E-03 |
| ARHGAP6   | 3999568 | 3999580 | 1.63E-03 |
| SMARCA5   | 2745646 | 2745662 | 1.63E-03 |
| GPR116    | 2955863 | 2955877 | 1.63E-03 |
| OR2D3     | 3318982 | 3318985 | 1.63E-03 |
| DTNBP1    | 2943236 | 2943245 | 1.63E-03 |
| AR        | 3979912 | 3979925 | 1.64E-03 |
| ALDOC     | 3750767 | 3750781 | 1.64E-03 |
| ZNF276    | 3674349 | 3674369 | 1.64E-03 |
| HOOK1     | 2338625 | 2338636 | 1.64E-03 |
| MAP6      | 3382410 | 3382422 | 1.65E-03 |
| BMP7      | 3910980 | 3910996 | 1.65E-03 |
| CCNY      | 3242425 | 3242429 | 1.65E-03 |
| CCM2      | 3000167 | 3000193 | 1.65E-03 |
| CLDN15    | 3064574 | 3064589 | 1.65E-03 |
| DRP2      | 3984702 | 3984737 | 1.66E-03 |
| CCDC62    | 3435515 | 3435542 | 1.66E-03 |
| CEP192    | 3779817 | 3779928 | 1.66E-03 |
| TET1      | 3249886 | 3249895 | 1.67E-03 |
| OMA1      | 2414558 | 2414781 | 1.67E-03 |
| ALDH2     | 3432090 | 3432101 | 1.67E-03 |
| C14orf177 | 3551029 | 3551037 | 1.67E-03 |
| TNKS1BP1  | 3373675 | 3373710 | 1.68E-03 |
| SLC1A1    | 3160658 | 3160687 | 1.69E-03 |
| SNX20     | 3691193 | 3691204 | 1.69E-03 |
| PPOX      | 2363484 | 2363488 | 1.70E-03 |
| DENND4C   | 3164221 | 3164270 | 1.70E-03 |
| C1orf63   | 2402111 | 2402121 | 1.71E-03 |
| CFH       | 2373336 | 2373344 | 1.71E-03 |
| SCAF1     | 3838757 | 3838777 | 1.71E-03 |
| MACF1     | 2331213 | 2331352 | 1.72E-03 |
| KCTD20    | 2905069 | 2905070 | 1.72E-03 |
| PEX5      | 3403299 | 3403305 | 1.73E-03 |
| MAPK15    | 3119792 | 3119814 | 1.73E-03 |



|          |         |         |          |
|----------|---------|---------|----------|
| INO80    | 3619773 | 3619866 | 1.73E-03 |
| TYMP     | 3966000 | 3966002 | 1.73E-03 |
| FAM188B  | 2995491 | 2995555 | 1.73E-03 |
| TRAM2    | 2957227 | 2957231 | 1.73E-03 |
| PRDM2    | 2321238 | 2321289 | 1.74E-03 |
| CACNA1B  | 3195568 | 3195701 | 1.75E-03 |
| NR5A1    | 3225058 | 3225070 | 1.75E-03 |
| TRPM5    | 3359267 | 3359277 | 1.76E-03 |
| DEAF1    | 3358262 | 3358290 | 1.77E-03 |
| TRRAP    | 3014411 | 3014435 | 1.77E-03 |
| SLC43A3  | 3373845 | 3373855 | 1.78E-03 |
| PHKB     | 3659156 | 3659212 | 1.78E-03 |
| PADI2    | 2398820 | 2398841 | 1.78E-03 |
| SARDH    | 3228813 | 3228846 | 1.79E-03 |
| PBRM1    | 2676219 | 2676289 | 1.80E-03 |
| MARCKS   | 2922215 | 2922225 | 1.81E-03 |
| RYR2     | 2387126 | 2387322 | 1.81E-03 |
| MGC39372 | 2939014 | 2939015 | 1.81E-03 |
| LRRC6    | 3154136 | 3154159 | 1.81E-03 |
| ZNF385B  | 2590017 | 2590028 | 1.82E-03 |
| GCOM1    | 3595441 | 3595442 | 1.82E-03 |
| BCOR     | 4005392 | 4005429 | 1.83E-03 |
| LRRC40   | 2417737 | 2417740 | 1.83E-03 |
| PITPNM2  | 3475926 | 3475964 | 1.84E-03 |
| BFSP1    | 3899111 | 3899147 | 1.84E-03 |
| RARA     | 3720921 | 3720951 | 1.84E-03 |
| SGPP2    | 2529421 | 2529461 | 1.84E-03 |
| SH3TC2   | 2880679 | 2880714 | 1.86E-03 |
| CCDC126  | 2992963 | 2992983 | 1.87E-03 |
| ANXA13   | 3151719 | 3151726 | 1.87E-03 |
| PSG1     | 3863761 | 3863789 | 1.88E-03 |
| OVOL1    | 3335571 | 3335574 | 1.89E-03 |
| DIS3     | 3493391 | 3493439 | 1.89E-03 |
| DDX59    | 2450416 | 2450438 | 1.90E-03 |
| ERLEC1   | 2482230 | 2482231 | 1.90E-03 |
| CSF1R    | 2881187 | 2881191 | 1.90E-03 |
| SLC25A19 | 3770721 | 3770723 | 1.91E-03 |
| GSTA2    | 2957314 | 2957328 | 1.91E-03 |
| UGT3A2   | 2853325 | 2853342 | 1.92E-03 |
| CHD1L    | 2356721 | 2356755 | 1.92E-03 |
| MCM5     | 3944147 | 3944171 | 1.92E-03 |
| CLEC10A  | 3743306 | 3743324 | 1.93E-03 |
| C3orf17  | 2688882 | 2688908 | 1.94E-03 |
| ISL1     | 2808931 | 2808947 | 1.95E-03 |
| MGAT5    | 2506903 | 2506988 | 1.96E-03 |
| CTNS     | 3706700 | 3706709 | 1.97E-03 |
| ZNF433   | 3851150 | 3851186 | 1.97E-03 |

|           |         |         |          |
|-----------|---------|---------|----------|
| KIAA0664  | 3741171 | 3741178 | 1.98E-03 |
| KCNN2     | 2824581 | 2824635 | 1.98E-03 |
| PRUNE     | 2358623 | 2358633 | 1.99E-03 |
| SPAG4     | 3883441 | 3883444 | 1.99E-03 |
| ABCC3     | 3726691 | 3726731 | 1.99E-03 |
| DZIP3     | 2635263 | 2635326 | 1.99E-03 |
| POL3S     | 3688197 | 3688218 | 2.00E-03 |
| EPC2      | 2509832 | 2509885 | 2.00E-03 |
| SCIN      | 2990404 | 2990426 | 2.00E-03 |
| SLC38A5   | 4007437 | 4007460 | 2.00E-03 |
| FOXC1     | 2891768 | 2891781 | 2.01E-03 |
| DDX51     | 3478957 | 3478986 | 2.01E-03 |
| CUL5      | 3347549 | 3347580 | 2.01E-03 |
| FBXW12    | 2621647 | 2621661 | 2.02E-03 |
| SOX4      | 2897899 | 2897914 | 2.03E-03 |
| CPB2      | 3512843 | 3512848 | 2.03E-03 |
| ZCCHC3    | 3873102 | 3873106 | 2.03E-03 |
| ANK3      | 3290875 | 3290917 | 2.03E-03 |
| RAB11FIP3 | 3642875 | 3642929 | 2.04E-03 |
| KCNN2     | 2824581 | 2824626 | 2.04E-03 |
| SLC48A1   | 3413212 | 3413231 | 2.04E-03 |
| RAD51     | 3590086 | 3590099 | 2.05E-03 |
| ANKRD11   | 3704717 | 3704781 | 2.05E-03 |
| C1orf63   | 2402111 | 2402115 | 2.06E-03 |
| TROAP     | 3413875 | 3413880 | 2.07E-03 |
| KRT25     | 3756447 | 3756450 | 2.07E-03 |
| SLC17A3   | 2946106 | 2946118 | 2.08E-03 |
| TBX19     | 2366184 | 2366209 | 2.08E-03 |
| NLRP14    | 3319018 | 3319020 | 2.08E-03 |
| COQ4      | 3190339 | 3190347 | 2.09E-03 |
| EPHB2     | 2324919 | 2324962 | 2.09E-03 |
| BAT2      | 2902463 | 2902495 | 2.09E-03 |
| ITIH1     | 2624147 | 2624158 | 2.09E-03 |
| PON1      | 3061942 | 3061944 | 2.09E-03 |
| NEK5      | 3514804 | 3514840 | 2.10E-03 |
| PIBF1     | 3493448 | 3493477 | 2.10E-03 |
| SOX2      | 2654454 | 2654505 | 2.11E-03 |
| NEK1      | 2793221 | 2793237 | 2.11E-03 |
| MMP15     | 3663074 | 3663095 | 2.11E-03 |
| TEF       | 3946817 | 3946834 | 2.12E-03 |
| ZFAND3    | 2905664 | 2905668 | 2.12E-03 |
| GPR152    | 3337109 | 3337110 | 2.12E-03 |
| BPHL      | 2892393 | 2892400 | 2.13E-03 |
| RNASSEL   | 2447124 | 2447128 | 2.13E-03 |
| PLA2G6    | 3960388 | 3960400 | 2.13E-03 |
| PHKB      | 3659156 | 3659233 | 2.14E-03 |
| CAPN11    | 2908371 | 2908401 | 2.15E-03 |

|            |         |         |          |
|------------|---------|---------|----------|
| PEX5L      | 2707045 | 2707051 | 2.15E-03 |
| BMP4       | 3565206 | 3565209 | 2.15E-03 |
| C1orf97    | 2378710 | 2378713 | 2.16E-03 |
| PCSK2      | 3877892 | 3877950 | 2.16E-03 |
| TRPM2      | 3923702 | 3923708 | 2.17E-03 |
| SLC44A2    | 3820612 | 3820626 | 2.17E-03 |
| SYTL4      | 4015440 | 4015449 | 2.17E-03 |
| C10orf79   | 3305198 | 3305247 | 2.17E-03 |
| ADH4       | 2779124 | 2779136 | 2.17E-03 |
| POLR1B     | 2500838 | 2500853 | 2.18E-03 |
| ACSS1      | 3901696 | 3901713 | 2.18E-03 |
| NCRNA00164 | 2576788 | 2576808 | 2.18E-03 |
| TGFB1      | 3863021 | 3863040 | 2.18E-03 |
| LMBRD1     | 2960010 | 2960031 | 2.19E-03 |
| SETMAR     | 2608419 | 2608446 | 2.20E-03 |
| C20orf43   | 3890218 | 3890219 | 2.20E-03 |
| ALDH3A2    | 3714068 | 3714099 | 2.20E-03 |
| CDC42BPG   | 3377177 | 3377217 | 2.22E-03 |
| ZNF695     | 2465395 | 2465396 | 2.23E-03 |
| PARD3      | 3284596 | 3284604 | 2.23E-03 |
| PYGO1      | 3625440 | 3625449 | 2.23E-03 |
| PLEKHA7    | 3364525 | 3364582 | 2.23E-03 |
| HUNK       | 3917938 | 3917950 | 2.23E-03 |
| TNK1       | 3708528 | 3708532 | 2.24E-03 |
| USP8       | 3593652 | 3593701 | 2.24E-03 |
| SEC14L1    | 3735752 | 3735775 | 2.24E-03 |
| APOH       | 3767709 | 3767723 | 2.24E-03 |
| PDGFB      | 3961068 | 3961089 | 2.25E-03 |
| ASRGL1     | 3333443 | 3333461 | 2.25E-03 |
| SF3B1      | 2593670 | 2593674 | 2.26E-03 |
| UGT3A1     | 2853293 | 2853319 | 2.26E-03 |
| LOXHD1     | 3806366 | 3806399 | 2.27E-03 |
| SCN8A      | 3414969 | 3414983 | 2.27E-03 |
| ACAN       | 3607332 | 3607370 | 2.28E-03 |
| P2RX2      | 3439132 | 3439140 | 2.29E-03 |
| ASB14      | 2677922 | 2677932 | 2.29E-03 |
| C17orf53   | 3722770 | 3722792 | 2.29E-03 |
| FMNL3      | 3454006 | 3454024 | 2.30E-03 |
| BMP6       | 2893895 | 2893900 | 2.30E-03 |
| TNC        | 3222170 | 3222177 | 2.31E-03 |
| FBXW5      | 3230530 | 3230534 | 2.31E-03 |
| NRD1       | 2412529 | 2412586 | 2.32E-03 |
| CASK       | 4005859 | 4005872 | 2.32E-03 |
| NEK1       | 2793221 | 2793228 | 2.32E-03 |
| POLA1      | 3972093 | 3972120 | 2.32E-03 |
| KLHL14     | 3803418 | 3803464 | 2.32E-03 |
| LUC7L3     | 3726772 | 3726781 | 2.33E-03 |

|          |         |         |          |
|----------|---------|---------|----------|
| CCDC142  | 2560149 | 2560158 | 2.33E-03 |
| PLK2     | 2858023 | 2858046 | 2.34E-03 |
| PREX2    | 3102096 | 3102192 | 2.35E-03 |
| MAL2     | 3113180 | 3113183 | 2.35E-03 |
| ANKRD53  | 2487963 | 2487973 | 2.36E-03 |
| DOCK7    | 2415910 | 2415975 | 2.36E-03 |
| FLNA     | 4027176 | 4027189 | 2.36E-03 |
| BXDC2    | 2806231 | 2806237 | 2.36E-03 |
| RAI2     | 4001223 | 4001240 | 2.36E-03 |
| GRIN2D   | 3837759 | 3837767 | 2.37E-03 |
| LPHN2    | 2343823 | 2343945 | 2.37E-03 |
| LRRC6    | 3154136 | 3154155 | 2.38E-03 |
| CPEB2    | 2719361 | 2719405 | 2.38E-03 |
| JAG1     | 3897505 | 3897536 | 2.39E-03 |
| PDCD11   | 3262198 | 3262215 | 2.39E-03 |
| IRAK1    | 4027009 | 4027040 | 2.39E-03 |
| LNX1     | 2769346 | 2769350 | 2.39E-03 |
| SCNN1D   | 2315674 | 2315697 | 2.39E-03 |
| SMC6     | 2541944 | 2541946 | 2.39E-03 |
| LIPG     | 3787855 | 3787871 | 2.40E-03 |
| P4HA1    | 3294159 | 3294180 | 2.40E-03 |
| RASGRF2  | 2817941 | 2817944 | 2.40E-03 |
| ERLIN1   | 3303255 | 3303292 | 2.40E-03 |
| TEX13A   | 4016955 | 4016976 | 2.41E-03 |
| MED24    | 3755976 | 3756031 | 2.41E-03 |
| PPP1R8   | 2327259 | 2327279 | 2.41E-03 |
| SCN1A    | 2585322 | 2585334 | 2.42E-03 |
| RNF133   | 3070499 | 3070505 | 2.42E-03 |
| SUPT16H  | 3556323 | 3556325 | 2.42E-03 |
| NUP210L  | 2436467 | 2436502 | 2.43E-03 |
| PLXND1   | 2694817 | 2694909 | 2.43E-03 |
| PPP1R7   | 2536183 | 2536193 | 2.43E-03 |
| SCN1A    | 2585322 | 2585354 | 2.43E-03 |
| ADAM11   | 3723128 | 3723140 | 2.44E-03 |
| CHN1     | 2587961 | 2587985 | 2.44E-03 |
| GRM1     | 2929571 | 2929650 | 2.45E-03 |
| SCD5     | 2775735 | 2775739 | 2.45E-03 |
| WDR35    | 2542651 | 2542702 | 2.45E-03 |
| HKDC1    | 3250237 | 3250239 | 2.45E-03 |
| DDAH1    | 2420832 | 2420853 | 2.46E-03 |
| C16orf14 | 3643114 | 3643130 | 2.46E-03 |
| PRMT2    | 3924783 | 3924804 | 2.46E-03 |
| ARHGAP6  | 3999568 | 3999587 | 2.47E-03 |
| QTRT1    | 3820727 | 3820740 | 2.48E-03 |
| SAPS3    | 3337618 | 3337680 | 2.49E-03 |
| CENPE    | 2780172 | 2780220 | 2.49E-03 |
| ZC3H18   | 3673515 | 3673524 | 2.50E-03 |

|         |         |         |          |
|---------|---------|---------|----------|
| HCN1    | 2855963 | 2855968 | 2.51E-03 |
| CCDC65  | 3413643 | 3413655 | 2.51E-03 |
| C1QTNF5 | 3394330 | 3394338 | 2.52E-03 |
| ICOSLG  | 3934407 | 3934430 | 2.52E-03 |
| C7orf16 | 2995811 | 2995824 | 2.52E-03 |
| TMEM71  | 3154185 | 3154200 | 2.52E-03 |
| SLC28A3 | 3212420 | 3212441 | 2.53E-03 |
| PNPLA6  | 3818897 | 3818962 | 2.53E-03 |
| CTSG    | 3558347 | 3558357 | 2.53E-03 |
| SCNN1D  | 2315674 | 2315729 | 2.53E-03 |
| PDZD4   | 4026757 | 4026763 | 2.53E-03 |
| BZRAP1  | 3764289 | 3764332 | 2.55E-03 |
| DLEC1   | 2617477 | 2617536 | 2.55E-03 |
| ATP4A   | 3859832 | 3859861 | 2.57E-03 |
| STAG1   | 2696802 | 2696844 | 2.57E-03 |
| DHX9    | 2370991 | 2371037 | 2.58E-03 |
| PDS5A   | 2766588 | 2766623 | 2.58E-03 |
| MREG    | 2598496 | 2598506 | 2.58E-03 |
| FRK     | 2970897 | 2970900 | 2.59E-03 |
| RLF     | 2331771 | 2331805 | 2.59E-03 |
| PFKFB4  | 2673312 | 2673317 | 2.59E-03 |
| ATL3    | 3376560 | 3376574 | 2.59E-03 |
| PKHD1L1 | 3111561 | 3111644 | 2.59E-03 |
| ADORA2B | 3711869 | 3711870 | 2.59E-03 |
| FAM148A | 3596894 | 3596904 | 2.59E-03 |
| ZNF507  | 3828887 | 3828930 | 2.60E-03 |
| DNAH2   | 3709010 | 3709026 | 2.60E-03 |
| SCMH1   | 2408499 | 2408504 | 2.61E-03 |
| GPR52   | 2368180 | 2368183 | 2.62E-03 |
| ZKSCAN3 | 2900497 | 2900502 | 2.62E-03 |
| TRPV4   | 3470927 | 3470930 | 2.62E-03 |
| ARID3A  | 3815278 | 3815280 | 2.62E-03 |
| LTBP3   | 3377669 | 3377694 | 2.64E-03 |
| MYO10   | 2850071 | 2850163 | 2.64E-03 |
| BNIPL   | 2358646 | 2358655 | 2.64E-03 |
| CACNG5  | 3732049 | 3732052 | 2.64E-03 |
| TTRAP   | 2945645 | 2945648 | 2.65E-03 |
| AGPAT5  | 3083936 | 3083966 | 2.65E-03 |
| ADCY7   | 3659966 | 3659988 | 2.65E-03 |
| UGGT1   | 2504883 | 2504935 | 2.65E-03 |
| UACA    | 3631397 | 3631402 | 2.66E-03 |
| CENPB   | 3895722 | 3895723 | 2.66E-03 |
| CDH17   | 3144859 | 3144887 | 2.67E-03 |
| AGPAT1  | 2949801 | 2949808 | 2.67E-03 |
| HMGXB4  | 3944046 | 3944082 | 2.68E-03 |
| RHOT1   | 3717539 | 3717551 | 2.68E-03 |
| NEDD9   | 2941784 | 2941802 | 2.69E-03 |

|          |         |         |          |
|----------|---------|---------|----------|
| MYO15B   | 3734966 | 3735083 | 2.70E-03 |
| PLA2G2F  | 2323882 | 2323886 | 2.70E-03 |
| ADAMTSL3 | 3605395 | 3605491 | 2.71E-03 |
| CDK6     | 3061319 | 3061327 | 2.71E-03 |
| C11orf42 | 3318595 | 3318603 | 2.71E-03 |
| LYPD6    | 2510056 | 2510088 | 2.73E-03 |
| AIPL1    | 3743038 | 3743064 | 2.73E-03 |
| SIX5     | 3865618 | 3865625 | 2.73E-03 |
| AHI1     | 2975385 | 2975392 | 2.73E-03 |
| AFAP1L2  | 3307851 | 3307869 | 2.74E-03 |
| RAB1B    | 3336074 | 3336089 | 2.75E-03 |
| CD5L     | 2439138 | 2439157 | 2.75E-03 |
| MED16    | 3844822 | 3844844 | 2.75E-03 |
| A2BP1    | 3646613 | 3646903 | 2.76E-03 |
| C2orf56  | 2477372 | 2477377 | 2.76E-03 |
| UBE2A    | 3988874 | 3988886 | 2.77E-03 |
| LILRB4   | 3841621 | 3841632 | 2.77E-03 |
| FLJ42875 | 2392945 | 2392974 | 2.77E-03 |
| ACTN2    | 2386943 | 2386991 | 2.77E-03 |
| TLR10    | 2766192 | 2766197 | 2.77E-03 |
| DZIP1    | 3521372 | 3521415 | 2.77E-03 |
| MUSK     | 3184710 | 3184738 | 2.78E-03 |
| PLSCR1   | 2699726 | 2699767 | 2.78E-03 |
| SNORA66  | 2346863 | 2346909 | 2.78E-03 |
| MTERFD1  | 3145586 | 3145588 | 2.78E-03 |
| CACNA1I  | 3945942 | 3946025 | 2.79E-03 |
| CPVL     | 3043648 | 3043693 | 2.79E-03 |
| CHD5     | 2394478 | 2394532 | 2.79E-03 |
| PTPRB    | 3461795 | 3461844 | 2.79E-03 |
| TMEM200B | 2403707 | 2403714 | 2.79E-03 |
| BCL7C    | 3688038 | 3688054 | 2.80E-03 |
| GRIK2    | 2918982 | 2919062 | 2.80E-03 |
| PKN2     | 2345617 | 2345698 | 2.81E-03 |
| FBN2     | 2874371 | 2874469 | 2.82E-03 |
| ZNF503   | 3295376 | 3295431 | 2.82E-03 |
| SLC30A8  | 3112584 | 3112628 | 2.83E-03 |
| PCCB     | 2644014 | 2644040 | 2.83E-03 |
| DECR2    | 3642837 | 3642852 | 2.83E-03 |
| C17orf50 | 3718775 | 3718785 | 2.84E-03 |
| ZNF493   | 3826601 | 3826613 | 2.84E-03 |
| SPTBN5   | 3620156 | 3620207 | 2.85E-03 |
| PTPRO    | 3406329 | 3406379 | 2.86E-03 |
| MYST1    | 3656855 | 3656862 | 2.86E-03 |
| DTNBP1   | 2943236 | 2943244 | 2.87E-03 |
| SNRNP48  | 2893847 | 2893861 | 2.87E-03 |
| BBS9     | 2996321 | 2996337 | 2.87E-03 |
| KIAA1033 | 3429754 | 3429782 | 2.87E-03 |

|          |         |         |          |
|----------|---------|---------|----------|
| DLG5     | 3296386 | 3296430 | 2.87E-03 |
| RNF7     | 2645690 | 2645696 | 2.87E-03 |
| FAM47B   | 3973396 | 3973398 | 2.88E-03 |
| LAMB3    | 2453793 | 2453809 | 2.88E-03 |
| FCGBP    | 3862188 | 3862202 | 2.89E-03 |
| PPIL4    | 2978876 | 2978913 | 2.89E-03 |
| PTGES    | 3227070 | 3227085 | 2.89E-03 |
| APLF     | 2486851 | 2486873 | 2.90E-03 |
| DCAF5    | 3569926 | 3569953 | 2.90E-03 |
| C11orf59 | 3380980 | 3380991 | 2.91E-03 |
| GFRA1    | 3308241 | 3308341 | 2.91E-03 |
| NKD2     | 2798952 | 2798985 | 2.91E-03 |
| CNOT7    | 3125775 | 3125783 | 2.91E-03 |
| ABHD12B  | 3535307 | 3535308 | 2.92E-03 |
| ZC3H6    | 2500722 | 2500762 | 2.92E-03 |
| CRISPLD2 | 3671935 | 3671948 | 2.93E-03 |
| GRIK1    | 3928211 | 3928246 | 2.93E-03 |
| PAPPA2   | 2368590 | 2368597 | 2.93E-03 |
| HCN4     | 3632424 | 3632436 | 2.93E-03 |
| TRPM6    | 3210013 | 3210095 | 2.93E-03 |
| ING3     | 3021123 | 3021135 | 2.93E-03 |
| FLT1     | 3507282 | 3507322 | 2.94E-03 |
| BCL2     | 3811339 | 3811448 | 2.94E-03 |
| IQCE     | 2987578 | 2987616 | 2.94E-03 |
| LIPG     | 3787855 | 3787861 | 2.94E-03 |
| ANKRA2   | 2862380 | 2862400 | 2.95E-03 |
| INTS10   | 3088405 | 3088429 | 2.96E-03 |
| KCTD17   | 3944637 | 3944645 | 2.96E-03 |
| WDR75    | 2519756 | 2519785 | 2.96E-03 |
| DCAF8    | 2440018 | 2440089 | 2.99E-03 |
| TET3     | 2489071 | 2489105 | 2.99E-03 |
| ATM      | 3347658 | 3347731 | 2.99E-03 |
| BZRAP1   | 3764289 | 3764344 | 2.99E-03 |
| ITGB8    | 2991860 | 2991899 | 3.00E-03 |
| NTN5     | 3867287 | 3867296 | 3.01E-03 |
| SLC26A4  | 3018605 | 3018612 | 3.01E-03 |
| ETNK2    | 2451870 | 2451888 | 3.02E-03 |
| SF4      | 3855660 | 3855690 | 3.03E-03 |
| FLJ46010 | 2812591 | 2812620 | 3.03E-03 |
| GPR98    | 2819779 | 2819846 | 3.04E-03 |
| BRSK1    | 3842059 | 3842079 | 3.04E-03 |
| NUDCD1   | 3148796 | 3148811 | 3.04E-03 |
| WDR60    | 3034449 | 3034473 | 3.04E-03 |
| PEX19    | 2440117 | 2440124 | 3.04E-03 |
| TTC14    | 2654306 | 2654321 | 3.04E-03 |
| PKP2     | 3450234 | 3450240 | 3.04E-03 |
| GIN1     | 2869275 | 2869296 | 3.04E-03 |

|          |         |         |          |
|----------|---------|---------|----------|
| SNAP25   | 3876245 | 3876282 | 3.05E-03 |
| ATXN10   | 3948754 | 3948847 | 3.05E-03 |
| RYR1     | 3832457 | 3832489 | 3.06E-03 |
| SMARCD2  | 3766415 | 3766425 | 3.06E-03 |
| CNPY4    | 3015276 | 3015285 | 3.06E-03 |
| YEATS2   | 2655168 | 2655172 | 3.07E-03 |
| STC1     | 3128046 | 3128074 | 3.07E-03 |
| GRWD1    | 3837796 | 3837815 | 3.07E-03 |
| PAPLN    | 3543539 | 3543562 | 3.07E-03 |
| RNF32    | 3033728 | 3033754 | 3.07E-03 |
| PTGES    | 3227070 | 3227086 | 3.07E-03 |
| RB1CC1   | 3135184 | 3135210 | 3.07E-03 |
| TMEM126B | 3342983 | 3342998 | 3.08E-03 |
| ANKRD32  | 2820622 | 2820683 | 3.08E-03 |
| RAB20    | 3525498 | 3525522 | 3.09E-03 |
| MAP4     | 2672966 | 2672969 | 3.09E-03 |
| SHANK1   | 3868587 | 3868604 | 3.09E-03 |
| SCUBE1   | 3962839 | 3962893 | 3.10E-03 |
| SEMA6D   | 3592755 | 3592851 | 3.10E-03 |
| FHL2     | 2568687 | 2568729 | 3.10E-03 |
| STAG3    | 3015338 | 3015343 | 3.11E-03 |
| CNNM1    | 3260265 | 3260311 | 3.11E-03 |
| INPP5F   | 3267382 | 3267399 | 3.11E-03 |
| SYT9     | 3319073 | 3319100 | 3.11E-03 |
| ITIH5L   | 4009751 | 4009758 | 3.11E-03 |
| CARD14   | 3737192 | 3737232 | 3.12E-03 |
|          | 2494151 | 2494159 | 3.13E-03 |
| NBR1     | 3722417 | 3722470 | 3.13E-03 |
| KIRREL   | 2362089 | 2362139 | 3.13E-03 |
| TMEM165  | 2727793 | 2727838 | 3.14E-03 |
| TRPM4    | 3838317 | 3838328 | 3.14E-03 |
| C15orf27 | 3602569 | 3602603 | 3.14E-03 |
| EFR3B    | 2473376 | 2473406 | 3.14E-03 |
| ZNF770   | 3617830 | 3617831 | 3.14E-03 |
| FGF1     | 2879166 | 2879188 | 3.15E-03 |
| ZNF395   | 3129304 | 3129333 | 3.15E-03 |
| SLC8A3   | 3570373 | 3570379 | 3.16E-03 |
| RNGTT    | 2963929 | 2964012 | 3.16E-03 |
| EXO1     | 2388219 | 2388244 | 3.19E-03 |
| RBL1     | 3904747 | 3904752 | 3.19E-03 |
| KIAA0427 | 3787675 | 3787687 | 3.20E-03 |
| SSH3     | 3336906 | 3336944 | 3.20E-03 |
| LCP2     | 2886595 | 2886621 | 3.21E-03 |
| PUS7L    | 3451670 | 3451689 | 3.21E-03 |
| ZDHHC17  | 3423184 | 3423199 | 3.21E-03 |
| LRRC6    | 3154136 | 3154151 | 3.21E-03 |
| PCDH24   | 2842624 | 2842664 | 3.21E-03 |



|           |         |         |          |
|-----------|---------|---------|----------|
| PNLIPRP2  | 3265952 | 3265966 | 3.22E-03 |
| NEDD9     | 2941784 | 2941793 | 3.22E-03 |
| BCL7C     | 3688038 | 3688059 | 3.22E-03 |
| MMAA      | 2746164 | 2746178 | 3.23E-03 |
| NXF3      | 4016319 | 4016321 | 3.23E-03 |
| BCL7C     | 3688038 | 3688060 | 3.24E-03 |
| SCEL      | 3494629 | 3494683 | 3.25E-03 |
| ABCC12    | 3690388 | 3690410 | 3.26E-03 |
| ZNF721    | 2756404 | 2756420 | 3.26E-03 |
| PPCDC     | 3602039 | 3602047 | 3.26E-03 |
| LRP5      | 3337516 | 3337600 | 3.27E-03 |
| CCT4      | 2555630 | 2555674 | 3.27E-03 |
| MRPL13    | 3150797 | 3150819 | 3.27E-03 |
| TBX2      | 3729834 | 3729878 | 3.27E-03 |
| ADAMTS19  | 2827772 | 2827775 | 3.28E-03 |
| HEMK1     | 2622859 | 2622890 | 3.28E-03 |
| KIAA1712  | 2752243 | 2752258 | 3.28E-03 |
| LOC84856  | 3243581 | 3243593 | 3.28E-03 |
| HIP1      | 3057370 | 3057390 | 3.29E-03 |
| ATP2C1    | 2642325 | 2642385 | 3.29E-03 |
| UPK1B     | 2637831 | 2637844 | 3.30E-03 |
| ZHX2      | 3113894 | 3113896 | 3.30E-03 |
| FAM71E2   | 3871389 | 3871397 | 3.30E-03 |
| RNF160    | 3927949 | 3927984 | 3.31E-03 |
| RGS18     | 2372719 | 2372727 | 3.32E-03 |
| AGGF1     | 2816563 | 2816583 | 3.32E-03 |
| UNC45A    | 3608520 | 3608538 | 3.33E-03 |
| TJP1      | 3615579 | 3615600 | 3.33E-03 |
| CSPG5     | 2672821 | 2672824 | 3.33E-03 |
| GLCCI1    | 2989537 | 2989653 | 3.33E-03 |
| TJP1      | 3615579 | 3615619 | 3.33E-03 |
| TEAD3     | 2951500 | 2951502 | 3.33E-03 |
| CC2D1A    | 3822444 | 3822489 | 3.35E-03 |
| ZNF317    | 3819880 | 3819900 | 3.36E-03 |
| SERPINB12 | 3791815 | 3791837 | 3.36E-03 |
| KLK10     | 3868828 | 3868838 | 3.36E-03 |
| CEP350    | 2369843 | 2369870 | 3.36E-03 |
| MUC4      | 2712236 | 2712276 | 3.36E-03 |
| MED14     | 4005644 | 4005649 | 3.36E-03 |
| CRYGS     | 2709402 | 2709407 | 3.36E-03 |
| TCFL5     | 3913483 | 3913507 | 3.37E-03 |
| TNFAIP8L3 | 3623948 | 3623951 | 3.37E-03 |
| SNAP29    | 3937755 | 3937759 | 3.37E-03 |
| FBXO8     | 2794356 | 2794357 | 3.37E-03 |
| ESYT2     | 3082248 | 3082253 | 3.38E-03 |
| C5orf34   | 2855614 | 2855626 | 3.39E-03 |
| CLOCK     | 2769947 | 2769999 | 3.39E-03 |

|           |         |         |          |
|-----------|---------|---------|----------|
| PLCB2     | 3619326 | 3619344 | 3.39E-03 |
| CNTROB    | 3709327 | 3709343 | 3.39E-03 |
| SMC3      | 3263790 | 3263807 | 3.40E-03 |
| IFNA5     | 3201255 | 3201261 | 3.40E-03 |
| SLC22A9   | 3333831 | 3333860 | 3.40E-03 |
| WDR64     | 2388148 | 2388203 | 3.42E-03 |
| IL27RA    | 3822551 | 3822567 | 3.42E-03 |
| FLT1      | 3507282 | 3507375 | 3.43E-03 |
| CDC14A    | 2348896 | 2348934 | 3.43E-03 |
| MCM5      | 3944147 | 3944174 | 3.43E-03 |
| ERCC1     | 3865378 | 3865397 | 3.43E-03 |
| MAP3K7IP2 | 2930592 | 2930650 | 3.44E-03 |
| PRPF6     | 3893849 | 3893865 | 3.44E-03 |
| SMARCA4   | 3820921 | 3820965 | 3.44E-03 |
| ESCO1     | 3800779 | 3800799 | 3.44E-03 |
| VWF       | 3441685 | 3441785 | 3.44E-03 |
| GOLGA1    | 3225224 | 3225282 | 3.45E-03 |
| MRGPRF    | 3379777 | 3379781 | 3.45E-03 |
| NAPSA     | 3868400 | 3868435 | 3.45E-03 |
| CTTN      | 3338552 | 3338613 | 3.45E-03 |
| KLK2      | 3839563 | 3839570 | 3.45E-03 |
| KIAA0391  | 3532393 | 3532426 | 3.45E-03 |
| UNQ9374   | 2886535 | 2886539 | 3.46E-03 |
| CKAP5     | 3371719 | 3371784 | 3.46E-03 |
| DNAI1     | 3167427 | 3167431 | 3.46E-03 |
| CUL9      | 2907754 | 2907791 | 3.46E-03 |
| BRD8      | 2877257 | 2877291 | 3.47E-03 |
| EPB41L1   | 3883690 | 3883773 | 3.47E-03 |
| LILRA3    | 3870611 | 3870670 | 3.48E-03 |
| SLC9A3    | 2845362 | 2845366 | 3.48E-03 |
| ASCC3     | 2966636 | 2966723 | 3.48E-03 |
| C20orf185 | 3882241 | 3882254 | 3.49E-03 |
| LMO7      | 3494137 | 3494238 | 3.49E-03 |
| PHGDH     | 2354634 | 2354690 | 3.49E-03 |
| ZP3       | 3009441 | 3009448 | 3.49E-03 |
| PTPRE     | 3270270 | 3270353 | 3.50E-03 |
| MUPCDH    | 3358201 | 3358235 | 3.50E-03 |
| TTK       | 2914777 | 2914782 | 3.52E-03 |
| DENND5A   | 3362263 | 3362306 | 3.52E-03 |
| SPPL2B    | 3816424 | 3816452 | 3.52E-03 |
| SLC35B3   | 2940987 | 2941009 | 3.52E-03 |
| TRIO      | 2802398 | 2802507 | 3.52E-03 |
| CRTC1     | 3825292 | 3825369 | 3.53E-03 |
| FCHSD1    | 2878778 | 2878792 | 3.53E-03 |
| ABCA12    | 2598145 | 2598185 | 3.54E-03 |
| AKAP9     | 3012381 | 3012499 | 3.54E-03 |
| TRMT6     | 3896524 | 3896539 | 3.55E-03 |

|          |         |         |          |
|----------|---------|---------|----------|
| SLCO4A1  | 3892812 | 3892846 | 3.55E-03 |
| RASGRF2  | 2817941 | 2817998 | 3.55E-03 |
| SLMAP    | 2625793 | 2625843 | 3.55E-03 |
| ZNF790   | 3860491 | 3860536 | 3.55E-03 |
| SERPINI1 | 2651165 | 2651180 | 3.56E-03 |
| SMEK1    | 3576545 | 3576552 | 3.56E-03 |
| CFTR     | 3020646 | 3020699 | 3.56E-03 |
| GPHN     | 3540862 | 3540864 | 3.56E-03 |
| ESCO1    | 3800779 | 3800797 | 3.56E-03 |
| FASN     | 3774635 | 3774687 | 3.57E-03 |
| LLGL2    | 3734903 | 3734926 | 3.57E-03 |
| PRKCA    | 3731826 | 3732006 | 3.57E-03 |
| CASC1    | 3447798 | 3447800 | 3.58E-03 |
| C2orf65  | 2560317 | 2560350 | 3.58E-03 |
| AGPAT2   | 3230282 | 3230287 | 3.59E-03 |
| TTK      | 2914777 | 2914791 | 3.60E-03 |
| C2orf19  | 2605660 | 2605665 | 3.60E-03 |
| CDCA8    | 2330773 | 2330788 | 3.60E-03 |
| MMP28    | 3753760 | 3753784 | 3.60E-03 |
| ROBO3    | 3354293 | 3354340 | 3.61E-03 |
| C12orf24 | 3431553 | 3431556 | 3.61E-03 |
| HYDIN    | 3697434 | 3697486 | 3.62E-03 |
| PHC3     | 2704894 | 2704908 | 3.62E-03 |
| ZNF550   | 3872310 | 3872315 | 3.62E-03 |
| NT5DC3   | 3468743 | 3468752 | 3.63E-03 |
| UBE2CBP  | 2962683 | 2962731 | 3.63E-03 |
| USF2     | 3830277 | 3830279 | 3.63E-03 |
| B4GALNT3 | 3400236 | 3400238 | 3.64E-03 |
| SLC35B2  | 2955061 | 2955068 | 3.65E-03 |
| EDN2     | 2408643 | 2408669 | 3.66E-03 |
| MTTP     | 2737257 | 2737279 | 3.66E-03 |
| TET1     | 3249886 | 3249904 | 3.66E-03 |
| FLNA     | 4027176 | 4027177 | 3.68E-03 |
| GNB3     | 3402874 | 3402880 | 3.68E-03 |
|          | 3259367 | 3259382 | 3.68E-03 |
| DTWD1    | 3593452 | 3593479 | 3.68E-03 |
| HIP1     | 3057370 | 3057400 | 3.68E-03 |
| MSH5     | 2902633 | 2902656 | 3.69E-03 |
| SMC6     | 2541944 | 2541963 | 3.69E-03 |
|          | 3874584 | 3874587 | 3.69E-03 |
| ZNF493   | 3826601 | 3826620 | 3.69E-03 |
| UTP3     | 2730531 | 2730532 | 3.70E-03 |
| ATP2A1   | 3655060 | 3655080 | 3.70E-03 |
| PDE2A    | 3381150 | 3381154 | 3.71E-03 |
| LRR6     | 3154136 | 3154144 | 3.71E-03 |
| C8orf41  | 3130823 | 3130838 | 3.71E-03 |
| FAM178A  | 3260829 | 3260839 | 3.71E-03 |

|          |         |         |          |
|----------|---------|---------|----------|
| ERN1     | 3766651 | 3766657 | 3.72E-03 |
| NAE1     | 3695268 | 3695269 | 3.72E-03 |
| SLC12A5  | 3887241 | 3887275 | 3.72E-03 |
| GLYR1    | 3678395 | 3678402 | 3.72E-03 |
| CDH4     | 3892067 | 3892091 | 3.73E-03 |
| ECE2     | 2655606 | 2655621 | 3.73E-03 |
| LHX4     | 2370032 | 2370061 | 3.73E-03 |
| PCDHGA9  | 2832533 | 2832624 | 3.74E-03 |
| VWA3B    | 2495279 | 2495400 | 3.75E-03 |
| SNAPIN   | 2359764 | 2359770 | 3.75E-03 |
| TGDS     | 3520989 | 3521001 | 3.75E-03 |
| USP34    | 2555277 | 2555401 | 3.76E-03 |
| DUS4L    | 3018509 | 3018534 | 3.76E-03 |
| ZBTB2    | 2979679 | 2979680 | 3.76E-03 |
| ATP2A2   | 3431483 | 3431539 | 3.77E-03 |
| EML4     | 2478748 | 2478794 | 3.77E-03 |
| CYP19A1  | 3624003 | 3624038 | 3.77E-03 |
| ATF6B    | 2949622 | 2949729 | 3.78E-03 |
| ESRRB    | 3545022 | 3545056 | 3.78E-03 |
| AMOTL1   | 3345222 | 3345248 | 3.78E-03 |
| ZNF26    | 3439063 | 3439109 | 3.78E-03 |
| YEATS2   | 2655168 | 2655248 | 3.79E-03 |
| NKTR     | 2619344 | 2619386 | 3.79E-03 |
| ZNF425   | 3078493 | 3078496 | 3.79E-03 |
| FASN     | 3774635 | 3774663 | 3.80E-03 |
| FIGNL1   | 3050367 | 3050380 | 3.80E-03 |
| DEPDC4   | 3467788 | 3467789 | 3.80E-03 |
| SEC31B   | 3303478 | 3303513 | 3.81E-03 |
| DTX1     | 3432556 | 3432579 | 3.81E-03 |
| CEP170   | 2463864 | 2463865 | 3.81E-03 |
| C5orf24  | 2829542 | 2829549 | 3.81E-03 |
| RASEF    | 3211938 | 3211983 | 3.82E-03 |
| PAFAH2   | 2402493 | 2402509 | 3.82E-03 |
| WNK2     | 3179706 | 3179791 | 3.82E-03 |
| MLL5     | 3017547 | 3017616 | 3.83E-03 |
| HTR1F    | 2631940 | 2631977 | 3.83E-03 |
| CNKSR1   | 2326327 | 2326339 | 3.84E-03 |
| NIPSNAP1 | 3956909 | 3956913 | 3.84E-03 |
| TEKT4    | 2493746 | 2493758 | 3.84E-03 |
| KRT2     | 3455692 | 3455714 | 3.84E-03 |
| ESCO1    | 3800779 | 3800796 | 3.85E-03 |
| CCDC91   | 3409432 | 3409503 | 3.85E-03 |
| RNASEL   | 2447124 | 2447129 | 3.85E-03 |
| MMP11    | 3939470 | 3939477 | 3.86E-03 |
| C9orf100 | 3204692 | 3204712 | 3.86E-03 |
| TTC37    | 2867693 | 2867708 | 3.86E-03 |
| GABRA2   | 2767972 | 2768011 | 3.88E-03 |

|           |         |         |          |
|-----------|---------|---------|----------|
| KPNA6     | 2328674 | 2328698 | 3.88E-03 |
| PI4K2B    | 2721777 | 2721800 | 3.88E-03 |
| ZNF461    | 3860596 | 3860606 | 3.88E-03 |
| RELA      | 3377789 | 3377803 | 3.88E-03 |
| FLJ41603  | 2835166 | 2835193 | 3.89E-03 |
| HERC2     | 3614901 | 3614922 | 3.89E-03 |
| IGSF1     | 4021777 | 4021789 | 3.89E-03 |
| MGAT4A    | 2566414 | 2566450 | 3.89E-03 |
| ABI2      | 2523689 | 2523735 | 3.90E-03 |
| GDAP1     | 3103607 | 3103630 | 3.91E-03 |
| MMP15     | 3663074 | 3663090 | 3.91E-03 |
| SBF1      | 3965833 | 3965908 | 3.91E-03 |
| SCGB2A1   | 3333417 | 3333423 | 3.92E-03 |
| WNT1      | 3413701 | 3413715 | 3.92E-03 |
| FBLIM1    | 2322036 | 2322038 | 3.92E-03 |
| ZNF154    | 3872380 | 3872386 | 3.93E-03 |
| KCNN4     | 3864646 | 3864659 | 3.93E-03 |
| FERMT2    | 3564919 | 3564951 | 3.93E-03 |
| UNC84B    | 3960827 | 3960834 | 3.94E-03 |
| KDR       | 2769810 | 2769863 | 3.94E-03 |
| CHRNA4    | 3913775 | 3913789 | 3.94E-03 |
| ALLC      | 2467249 | 2467291 | 3.95E-03 |
| KIAA0895L | 3695450 | 3695462 | 3.95E-03 |
| IGFBP5    | 2598828 | 2598834 | 3.96E-03 |
| LIPI      | 3925381 | 3925409 | 3.96E-03 |
| KCTD10    | 3470793 | 3470796 | 3.96E-03 |
| ADAP1     | 3034987 | 3034993 | 3.97E-03 |
| SDCCAG3   | 3229943 | 3229974 | 3.97E-03 |
| RCSD1     | 2365872 | 2365921 | 3.99E-03 |
|           | 2805482 | 2805487 | 3.99E-03 |
| LY96      | 3103523 | 3103532 | 4.00E-03 |
| ADAMTSL3  | 3605395 | 3605447 | 4.00E-03 |
| ALOX12    | 3708160 | 3708162 | 4.01E-03 |
| PIGB      | 3594825 | 3594871 | 4.01E-03 |
| ZNF638    | 2488114 | 2488209 | 4.01E-03 |
| GOLGB1    | 2691718 | 2691746 | 4.02E-03 |
| SLC39A12  | 3237352 | 3237364 | 4.02E-03 |
| ATP13A2   | 2398736 | 2398748 | 4.02E-03 |
| ARHGAP12  | 3283920 | 3283968 | 4.03E-03 |
| C9orf156  | 3216931 | 3216951 | 4.03E-03 |
| CCDC146   | 3009838 | 3009885 | 4.03E-03 |
| ZNF644    | 2422517 | 2422527 | 4.03E-03 |
| EIF2C3    | 2330133 | 2330194 | 4.04E-03 |
| NRAS      | 2429261 | 2429263 | 4.04E-03 |
| NIPSNAP3A | 3182957 | 3182979 | 4.05E-03 |
| FLJ25328  | 3823488 | 3823501 | 4.07E-03 |
| LRP1      | 3417842 | 3417857 | 4.07E-03 |

|          |         |         |          |
|----------|---------|---------|----------|
| RAD17    | 2813524 | 2813540 | 4.07E-03 |
| CHID1    | 3358538 | 3358584 | 4.08E-03 |
| ZMAT4    | 3132616 | 3132649 | 4.08E-03 |
| CALCR    | 3061538 | 3061548 | 4.09E-03 |
| TRIM31   | 2948205 | 2948231 | 4.10E-03 |
| TCF7L1   | 2491386 | 2491396 | 4.11E-03 |
| PPP2R1B  | 3391029 | 3391059 | 4.11E-03 |
| C1orf63  | 2402111 | 2402114 | 4.11E-03 |
| ATM      | 3347658 | 3347686 | 4.11E-03 |
| SMEK3P   | 4003500 | 4003510 | 4.12E-03 |
| MYH10    | 3744463 | 3744569 | 4.12E-03 |
| CEP135   | 2727976 | 2727978 | 4.13E-03 |
| BSG      | 3815014 | 3815021 | 4.13E-03 |
| SH3YL1   | 2537109 | 2537112 | 4.14E-03 |
| HSPA14   | 3236395 | 3236435 | 4.14E-03 |
| C7orf27  | 3035795 | 3035799 | 4.15E-03 |
| IGSF9    | 2439861 | 2439892 | 4.15E-03 |
| NGEF     | 2603987 | 2604014 | 4.16E-03 |
| CASS4    | 3890180 | 3890183 | 4.16E-03 |
| ZG16B    | 3645359 | 3645362 | 4.16E-03 |
| KIAA0195 | 3734797 | 3734860 | 4.17E-03 |
| C20orf27 | 3895679 | 3895687 | 4.18E-03 |
| ERCC8    | 2858668 | 2858674 | 4.19E-03 |
|          | 3686635 | 3686645 | 4.21E-03 |
| GPR160   | 2651835 | 2651870 | 4.21E-03 |
| CC2D1B   | 2412740 | 2412766 | 4.21E-03 |
| ZNF551   | 3843463 | 3843474 | 4.21E-03 |
| NRK      | 3986087 | 3986132 | 4.22E-03 |
| PIBF1    | 3493448 | 3493466 | 4.22E-03 |
| STK36    | 2527971 | 2527974 | 4.22E-03 |
| RYR1     | 3832457 | 3832524 | 4.22E-03 |
| TNR      | 2444899 | 2444912 | 4.23E-03 |
| SLCO1B3  | 3407629 | 3407663 | 4.24E-03 |
| ZNF83    | 3869650 | 3869652 | 4.25E-03 |
| HPRT1    | 3991698 | 3991712 | 4.25E-03 |
| PIK3R2   | 3824838 | 3824841 | 4.25E-03 |
| TNS3     | 3049522 | 3049595 | 4.26E-03 |
| THOC1    | 3795680 | 3795713 | 4.27E-03 |
| HPCAL1   | 7385611 | 2469440 | 4.28E-03 |
| RBM12    | 3904119 | 3904152 | 4.28E-03 |
| HSD3B1   | 2354553 | 2354567 | 4.28E-03 |
| ACOT12   | 2864796 | 2864809 | 4.28E-03 |
| ERBB3    | 3417249 | 3417259 | 4.28E-03 |
| C6orf227 | 2950771 | 2950774 | 4.28E-03 |
| ATP2B3   | 3995666 | 3995692 | 4.28E-03 |
| ARHGEF15 | 3709604 | 3709609 | 4.29E-03 |
| CXorf40A | 3994451 | 3994459 | 4.29E-03 |

|          |         |         |          |
|----------|---------|---------|----------|
| ADAP1    | 3034987 | 3034992 | 4.30E-03 |
| GPS1     | 3738490 | 3738503 | 4.30E-03 |
| VWA3B    | 2495279 | 2495359 | 4.31E-03 |
| ADCK1    | 3545564 | 3545592 | 4.31E-03 |
| NEK1     | 2793221 | 2793268 | 4.31E-03 |
| RPE65    | 2417500 | 2417513 | 4.33E-03 |
| COPS8    | 2534126 | 2534137 | 4.33E-03 |
| SPAG5    | 3750785 | 3750828 | 4.33E-03 |
| GPC6     | 3496637 | 3496640 | 4.33E-03 |
| RECQL    | 3446796 | 3446811 | 4.33E-03 |
| SYCP1    | 2353021 | 2353066 | 4.34E-03 |
| ZNHIT3   | 3719112 | 3719119 | 4.34E-03 |
| MRPS27   | 2861952 | 2861988 | 4.34E-03 |
| GALNTL4  | 3363091 | 3363108 | 4.36E-03 |
| RELA     | 3377789 | 3377796 | 4.36E-03 |
| C13orf23 | 3510362 | 3510373 | 4.36E-03 |
| MTHFD1L  | 2931391 | 2931484 | 4.37E-03 |
| ESCO1    | 3800779 | 3800795 | 4.37E-03 |
| RANBP2   | 2499158 | 2499188 | 4.37E-03 |
| LRCH4    | 3064082 | 3064107 | 4.37E-03 |
| CCDC52   | 2689112 | 2689130 | 4.38E-03 |
| ADCY1    | 3000342 | 3000416 | 4.39E-03 |
| MRPL44   | 2529782 | 2529784 | 4.39E-03 |
| TP53RK   | 3908052 | 3908056 | 4.40E-03 |
| QSOX2    | 3229797 | 3229798 | 4.40E-03 |
| OLFM1    | 3193725 | 3193743 | 4.40E-03 |
| C2orf67  | 2597273 | 2597288 | 4.41E-03 |
| OGFOD2   | 3435653 | 3435674 | 4.41E-03 |
| AOAH     | 3046062 | 3046135 | 4.41E-03 |
| TRIM28   | 3844238 | 3844255 | 4.41E-03 |
| OPN1SW   | 3071860 | 3071865 | 4.42E-03 |
| PRKD1    | 3559192 | 3559287 | 4.44E-03 |
| ENOSF1   | 3795866 | 3795906 | 4.44E-03 |
| C16orf67 | 3657286 | 3657288 | 4.45E-03 |
| KIAA0513 | 3672059 | 3672071 | 4.45E-03 |
| SBF1     | 3965833 | 3965909 | 4.45E-03 |
| KIAA1609 | 3702499 | 3702500 | 4.45E-03 |
| TSPYL5   | 3145801 | 3145813 | 4.46E-03 |
| C11orf35 | 3358112 | 3358136 | 4.46E-03 |
| PAPOLG   | 2484305 | 2484315 | 4.46E-03 |
| CBR4     | 2793054 | 2793095 | 4.46E-03 |
| PTPRT    | 3906390 | 3906486 | 4.47E-03 |
| UPP1     | 3000953 | 3000954 | 4.47E-03 |
| PRPF39   | 3534201 | 3534233 | 4.48E-03 |
| CACNB2   | 3237396 | 3237462 | 4.48E-03 |
| ZC3HC1   | 3072368 | 3072400 | 4.48E-03 |
| CDCA4    | 3581386 | 3581394 | 4.48E-03 |

|              |         |         |          |
|--------------|---------|---------|----------|
| TRIM54       | 2474430 | 2474444 | 4.48E-03 |
| CREBBP       | 3677795 | 3677888 | 4.48E-03 |
| EZH2         | 3078348 | 3078386 | 4.49E-03 |
| SH3RF1       | 2793137 | 2793156 | 4.50E-03 |
| DDR1         | 2901970 | 2901988 | 4.50E-03 |
| EPS15L1      | 3853814 | 3853884 | 4.50E-03 |
| KIAA0913     | 3251926 | 3251950 | 4.50E-03 |
| C20orf132    | 3904797 | 3904821 | 4.51E-03 |
| SLC35A1      | 2916345 | 2916382 | 4.51E-03 |
| CPB2         | 3512843 | 3512847 | 4.52E-03 |
| RTTN         | 3812426 | 3812492 | 4.52E-03 |
| SLMAP        | 2625793 | 2625825 | 4.52E-03 |
| OVOL1        | 3335571 | 3335588 | 4.52E-03 |
| ATP12A       | 3481890 | 3481925 | 4.52E-03 |
| PQBP1        | 3976930 | 3976940 | 4.53E-03 |
| RTN2         | 3865422 | 3865424 | 4.53E-03 |
| LONP1        | 3847356 | 3847371 | 4.53E-03 |
| LIPF         | 3256914 | 3256929 | 4.53E-03 |
| KCTD15       | 3829471 | 3829478 | 4.53E-03 |
| ARMC9        | 2531779 | 2531798 | 4.54E-03 |
| MARK1        | 2381177 | 2381241 | 4.54E-03 |
| HLX          | 2381368 | 2381389 | 4.55E-03 |
| CNTNAP4      | 3669171 | 3669203 | 4.55E-03 |
| LRDD         | 3358425 | 3358435 | 4.55E-03 |
| CTBS         | 2420467 | 2420470 | 4.55E-03 |
| TLR10        | 2766192 | 2766195 | 4.56E-03 |
|              | 2769095 | 2769100 | 4.56E-03 |
| AHCY         | 3903361 | 3903386 | 4.57E-03 |
| ZMAT1        | 4016001 | 4016008 | 4.58E-03 |
| LOC96610     | 3938384 | 3938416 | 4.58E-03 |
| PCDHB13      | 2832447 | 2832457 | 4.58E-03 |
| CDC40        | 2921086 | 2921129 | 4.59E-03 |
| GTF2I        | 3008376 | 3008409 | 4.59E-03 |
| MAP3K6       | 2403027 | 2403038 | 4.60E-03 |
| DPH5         | 2425447 | 2425461 | 4.61E-03 |
| IQGAP3       | 2438282 | 2438333 | 4.61E-03 |
| HSD3B7       | 3656737 | 3656749 | 4.61E-03 |
| CNTN4        | 2607923 | 2608065 | 4.61E-03 |
| 10-Mar       | 3766013 | 3766037 | 4.63E-03 |
| PPP4C        | 3655961 | 3655964 | 4.63E-03 |
| DKFZp451A211 | 3526495 | 3526500 | 4.63E-03 |
| HOOK2        | 3851720 | 3851746 | 4.64E-03 |
| TRIM23       | 2859734 | 2859745 | 4.64E-03 |
| KIAA0746     | 2764192 | 2764258 | 4.65E-03 |
| ELAVL2       | 3201784 | 3201816 | 4.65E-03 |
| FBXL6        | 3158478 | 3158483 | 4.65E-03 |
| PLXNA3       | 3996467 | 3996487 | 4.66E-03 |



|          |         |         |          |
|----------|---------|---------|----------|
| FGFR2    | 3310041 | 3310147 | 4.67E-03 |
| ZNF280D  | 3625823 | 3625884 | 4.67E-03 |
| TAF1D    | 3386814 | 3386853 | 4.68E-03 |
| NOTCH1   | 3230141 | 3230180 | 4.68E-03 |
| HAUS5    | 3830571 | 3830583 | 4.69E-03 |
| SYNGR4   | 3837744 | 3837751 | 4.69E-03 |
| MAOB     | 4006210 | 4006224 | 4.70E-03 |
| CACNA1G  | 3726618 | 3726633 | 4.70E-03 |
| KIAA1586 | 2911257 | 2911269 | 4.71E-03 |
| VPS37B   | 3475838 | 3475841 | 4.71E-03 |
| DHRS3    | 2397025 | 2397045 | 4.71E-03 |
| RYBP     | 2682436 | 2682437 | 4.72E-03 |
| KIF9     | 2672629 | 2672666 | 4.73E-03 |
| CSRP3    | 3365757 | 3365767 | 4.73E-03 |
| HMG20A   | 3602873 | 3602904 | 4.73E-03 |
| SLC2A13  | 3450899 | 3450943 | 4.74E-03 |
| RORC     | 2435261 | 2435276 | 4.74E-03 |
| SLC17A9  | 3893086 | 3893103 | 4.75E-03 |
| GALNT9   | 3479015 | 3479027 | 4.76E-03 |
| NUDCD1   | 3148796 | 3148814 | 4.76E-03 |
| RAB1B    | 3336074 | 3336086 | 4.76E-03 |
| PPP1R15B | 2452049 | 2452050 | 4.76E-03 |
| JAG1     | 3897505 | 3897555 | 4.76E-03 |
| ABCA8    | 3768627 | 3768696 | 4.77E-03 |
| PRODH2   | 3860003 | 3860021 | 4.77E-03 |
| FAIM     | 2644702 | 2644713 | 4.78E-03 |
| OGDHL    | 3288803 | 3288813 | 4.78E-03 |
| COL11A1  | 2425756 | 2425793 | 4.78E-03 |
| HACL1    | 2664395 | 2664416 | 4.79E-03 |
| HOXA3    | 3042777 | 3042788 | 4.80E-03 |
| USP36    | 3772581 | 3772648 | 4.80E-03 |
| CRH      | 3138618 | 3138620 | 4.81E-03 |
| SCFD1    | 3531032 | 3531051 | 4.81E-03 |
| SPATC1   | 3119970 | 3119979 | 4.82E-03 |
| PON1     | 3061942 | 3061943 | 4.82E-03 |
| SMARCAD1 | 2736259 | 2736292 | 4.83E-03 |
| C6orf204 | 2971564 | 2971587 | 4.83E-03 |
| PDXK     | 3923257 | 3923294 | 4.85E-03 |
| FAM175B  | 3269280 | 3269281 | 4.85E-03 |
| SLC35B3  | 2940987 | 2941001 | 4.85E-03 |
| KDM4B    | 3817733 | 3817837 | 4.85E-03 |
| TTC17    | 3327948 | 3327966 | 4.85E-03 |
| GDF1     | 3855285 | 3855291 | 4.86E-03 |
| SH3YL1   | 2537109 | 2537114 | 4.86E-03 |
| HSPG2    | 2400793 | 2400928 | 4.86E-03 |
| RIPK3    | 3558226 | 3558245 | 4.87E-03 |
| EPHA10   | 2407314 | 2407331 | 4.88E-03 |

|          |         |         |          |
|----------|---------|---------|----------|
| OCRL     | 3990374 | 3990390 | 4.88E-03 |
| SBNO2    | 3844978 | 3844981 | 4.88E-03 |
| LAMA5    | 3913018 | 3913022 | 4.88E-03 |
| ITGA11   | 3630736 | 3630804 | 4.89E-03 |
| AMZ2     | 3732736 | 3732780 | 4.90E-03 |
| C18orf32 | 3807474 | 3807475 | 4.91E-03 |
| FMO1     | 2367050 | 2367051 | 4.92E-03 |
| HOXB3    | 3761313 | 3761315 | 4.92E-03 |
| BAZ1A    | 3560711 | 3560713 | 4.92E-03 |
| C12orf36 | 3445252 | 3445261 | 4.93E-03 |
| C7orf64  | 3012677 | 3012682 | 4.93E-03 |
| RUFY2    | 3292634 | 3292668 | 4.93E-03 |
| AGGF1    | 2816563 | 2816585 | 4.93E-03 |
| MYH14    | 3839206 | 3839213 | 4.94E-03 |
| STAG1    | 2696802 | 2696803 | 4.94E-03 |
| ITGB3BP  | 2416218 | 2416245 | 4.94E-03 |
| C3orf51  | 2677624 | 2677626 | 4.94E-03 |
| HELQ     | 2776026 | 2776066 | 4.95E-03 |
| TM9SF3   | 3301857 | 3301862 | 4.95E-03 |
| PTP4A1   | 2911903 | 2911933 | 4.96E-03 |
| ANKS3    | 3678279 | 3678312 | 4.96E-03 |
| NOTCH3   | 3853108 | 3853162 | 4.96E-03 |
| CDC40    | 2921086 | 2921119 | 4.96E-03 |
| GPR124   | 3094334 | 3094338 | 4.96E-03 |
| GIN1     | 2869275 | 2869279 | 4.96E-03 |
| ITLN2    | 2440440 | 2440450 | 4.97E-03 |
| RBAK     | 2988459 | 2988484 | 4.97E-03 |
| KCNIP4   | 2762944 | 2762970 | 4.97E-03 |
| KCNK10   | 3575241 | 3575287 | 4.97E-03 |
| GLI2     | 2503374 | 2503433 | 4.97E-03 |
| TULP2    | 3867493 | 3867498 | 4.97E-03 |
| C19orf59 | 3819088 | 3819090 | 4.97E-03 |
| CAND1    | 3420713 | 3420747 | 4.99E-03 |
| BUB1B    | 3589697 | 3589714 | 5.00E-03 |
|          | 2713837 | 2713854 | 5.00E-03 |
| MYO1D    | 3752709 | 3752793 | 5.00E-03 |

| Fold-Change (Vasospasm vs. No vasospasm) | Fold-Change (Vasospasm vs. No vasospasm) (Description) |
|------------------------------------------|--------------------------------------------------------|
| -1.37                                    | Vasospasm down vs No vasospasm                         |
| 1.74                                     | Vasospasm up vs No vasospasm                           |
| -1.35                                    | Vasospasm down vs No vasospasm                         |
| -1.52                                    | Vasospasm down vs No vasospasm                         |
| -1.54                                    | Vasospasm down vs No vasospasm                         |
| -1.57                                    | Vasospasm down vs No vasospasm                         |
| -1.46                                    | Vasospasm down vs No vasospasm                         |
| 1.47                                     | Vasospasm up vs No vasospasm                           |
| -1.57                                    | Vasospasm down vs No vasospasm                         |
| -1.26                                    | Vasospasm down vs No vasospasm                         |
| -1.61                                    | Vasospasm down vs No vasospasm                         |
| -1.38                                    | Vasospasm down vs No vasospasm                         |
| -1.38                                    | Vasospasm down vs No vasospasm                         |
| -1.29                                    | Vasospasm down vs No vasospasm                         |
| -1.33                                    | Vasospasm down vs No vasospasm                         |
| 1.55                                     | Vasospasm up vs No vasospasm                           |
| -1.31                                    | Vasospasm down vs No vasospasm                         |
| 1.22                                     | Vasospasm up vs No vasospasm                           |
| -1.38                                    | Vasospasm down vs No vasospasm                         |
| -1.32                                    | Vasospasm down vs No vasospasm                         |
| -1.45                                    | Vasospasm down vs No vasospasm                         |
| 1.59                                     | Vasospasm up vs No vasospasm                           |
| 1.62                                     | Vasospasm up vs No vasospasm                           |
| -1.32                                    | Vasospasm down vs No vasospasm                         |
| -1.57                                    | Vasospasm down vs No vasospasm                         |
| -1.28                                    | Vasospasm down vs No vasospasm                         |
| -1.30                                    | Vasospasm down vs No vasospasm                         |
| -1.49                                    | Vasospasm down vs No vasospasm                         |
| -1.43                                    | Vasospasm down vs No vasospasm                         |
| -1.36                                    | Vasospasm down vs No vasospasm                         |
| -1.43                                    | Vasospasm down vs No vasospasm                         |
| -1.78                                    | Vasospasm down vs No vasospasm                         |
| -1.65                                    | Vasospasm down vs No vasospasm                         |
| -1.58                                    | Vasospasm down vs No vasospasm                         |
| 1.63                                     | Vasospasm up vs No vasospasm                           |
| -1.25                                    | Vasospasm down vs No vasospasm                         |
| -1.41                                    | Vasospasm down vs No vasospasm                         |
| -1.70                                    | Vasospasm down vs No vasospasm                         |
| -1.42                                    | Vasospasm down vs No vasospasm                         |
| 1.94                                     | Vasospasm up vs No vasospasm                           |
| 1.25                                     | Vasospasm up vs No vasospasm                           |
| -1.51                                    | Vasospasm down vs No vasospasm                         |
| -1.44                                    | Vasospasm down vs No vasospasm                         |
| -1.34                                    | Vasospasm down vs No vasospasm                         |
| -1.40                                    | Vasospasm down vs No vasospasm                         |
| 1.55                                     | Vasospasm up vs No vasospasm                           |

|       |                                |
|-------|--------------------------------|
| -1.47 | Vasospasm down vs No vasospasm |
| -1.44 | Vasospasm down vs No vasospasm |
| -1.30 | Vasospasm down vs No vasospasm |
| -1.41 | Vasospasm down vs No vasospasm |
| 2.27  | Vasospasm up vs No vasospasm   |
| -1.33 | Vasospasm down vs No vasospasm |
| -1.49 | Vasospasm down vs No vasospasm |
| -1.37 | Vasospasm down vs No vasospasm |
| -1.54 | Vasospasm down vs No vasospasm |
| 1.55  | Vasospasm up vs No vasospasm   |
| 1.99  | Vasospasm up vs No vasospasm   |
| -1.31 | Vasospasm down vs No vasospasm |
| 1.64  | Vasospasm up vs No vasospasm   |
| 2.15  | Vasospasm up vs No vasospasm   |
| -1.40 | Vasospasm down vs No vasospasm |
| -1.44 | Vasospasm down vs No vasospasm |
| -1.63 | Vasospasm down vs No vasospasm |
| -1.30 | Vasospasm down vs No vasospasm |
| -1.59 | Vasospasm down vs No vasospasm |
| -1.71 | Vasospasm down vs No vasospasm |
| -1.41 | Vasospasm down vs No vasospasm |
| -1.47 | Vasospasm down vs No vasospasm |
| 1.58  | Vasospasm up vs No vasospasm   |
| -1.25 | Vasospasm down vs No vasospasm |
| 1.28  | Vasospasm up vs No vasospasm   |
| -1.40 | Vasospasm down vs No vasospasm |
| 1.93  | Vasospasm up vs No vasospasm   |
| 1.91  | Vasospasm up vs No vasospasm   |
| -1.73 | Vasospasm down vs No vasospasm |
| -1.36 | Vasospasm down vs No vasospasm |
| -1.44 | Vasospasm down vs No vasospasm |
| 1.77  | Vasospasm up vs No vasospasm   |
| -1.53 | Vasospasm down vs No vasospasm |
| 1.46  | Vasospasm up vs No vasospasm   |
| -1.49 | Vasospasm down vs No vasospasm |
| 1.64  | Vasospasm up vs No vasospasm   |
| 2.01  | Vasospasm up vs No vasospasm   |
| -1.35 | Vasospasm down vs No vasospasm |
| -1.52 | Vasospasm down vs No vasospasm |
| -1.21 | Vasospasm down vs No vasospasm |
| -1.80 | Vasospasm down vs No vasospasm |
| -1.62 | Vasospasm down vs No vasospasm |
| 1.92  | Vasospasm up vs No vasospasm   |
| -1.60 | Vasospasm down vs No vasospasm |
| -1.46 | Vasospasm down vs No vasospasm |
| 1.31  | Vasospasm up vs No vasospasm   |
| 1.61  | Vasospasm up vs No vasospasm   |

|       |                                |
|-------|--------------------------------|
| 1.67  | Vasospasm up vs No vasospasm   |
| -1.39 | Vasospasm down vs No vasospasm |
| -1.52 | Vasospasm down vs No vasospasm |
| 2.55  | Vasospasm up vs No vasospasm   |
| 1.35  | Vasospasm up vs No vasospasm   |
| -1.24 | Vasospasm down vs No vasospasm |
| 1.48  | Vasospasm up vs No vasospasm   |
| -1.47 | Vasospasm down vs No vasospasm |
| -1.61 | Vasospasm down vs No vasospasm |
| -1.45 | Vasospasm down vs No vasospasm |
| 1.65  | Vasospasm up vs No vasospasm   |
| -1.24 | Vasospasm down vs No vasospasm |
| -1.27 | Vasospasm down vs No vasospasm |
| -1.24 | Vasospasm down vs No vasospasm |
| -1.33 | Vasospasm down vs No vasospasm |
| -1.23 | Vasospasm down vs No vasospasm |
| -1.59 | Vasospasm down vs No vasospasm |
| -1.44 | Vasospasm down vs No vasospasm |
| -1.33 | Vasospasm down vs No vasospasm |
| -1.23 | Vasospasm down vs No vasospasm |
| 1.48  | Vasospasm up vs No vasospasm   |
| -1.59 | Vasospasm down vs No vasospasm |
| 1.44  | Vasospasm up vs No vasospasm   |
| -1.42 | Vasospasm down vs No vasospasm |
| 2.35  | Vasospasm up vs No vasospasm   |
| -1.39 | Vasospasm down vs No vasospasm |
| -1.31 | Vasospasm down vs No vasospasm |
| 1.47  | Vasospasm up vs No vasospasm   |
| -1.31 | Vasospasm down vs No vasospasm |
| 1.58  | Vasospasm up vs No vasospasm   |
| -1.46 | Vasospasm down vs No vasospasm |
| 1.52  | Vasospasm up vs No vasospasm   |
| -1.47 | Vasospasm down vs No vasospasm |
| -1.24 | Vasospasm down vs No vasospasm |
| -1.37 | Vasospasm down vs No vasospasm |
| -1.34 | Vasospasm down vs No vasospasm |
| 2.00  | Vasospasm up vs No vasospasm   |
| 1.85  | Vasospasm up vs No vasospasm   |
| -1.26 | Vasospasm down vs No vasospasm |
| -1.35 | Vasospasm down vs No vasospasm |
| -1.39 | Vasospasm down vs No vasospasm |
| -1.22 | Vasospasm down vs No vasospasm |
| 1.67  | Vasospasm up vs No vasospasm   |
| -1.26 | Vasospasm down vs No vasospasm |
| -1.46 | Vasospasm down vs No vasospasm |
| -1.37 | Vasospasm down vs No vasospasm |
| -1.57 | Vasospasm down vs No vasospasm |

|       |                                |
|-------|--------------------------------|
| 2.14  | Vasospasm up vs No vasospasm   |
| -1.42 | Vasospasm down vs No vasospasm |
| -1.42 | Vasospasm down vs No vasospasm |
| 2.08  | Vasospasm up vs No vasospasm   |
| 1.51  | Vasospasm up vs No vasospasm   |
| 1.56  | Vasospasm up vs No vasospasm   |
| 1.54  | Vasospasm up vs No vasospasm   |
| -1.32 | Vasospasm down vs No vasospasm |
| -1.26 | Vasospasm down vs No vasospasm |
| -1.31 | Vasospasm down vs No vasospasm |
| -1.58 | Vasospasm down vs No vasospasm |
| -1.45 | Vasospasm down vs No vasospasm |
| 1.74  | Vasospasm up vs No vasospasm   |
| 1.78  | Vasospasm up vs No vasospasm   |
| 1.89  | Vasospasm up vs No vasospasm   |
| 1.47  | Vasospasm up vs No vasospasm   |
| 1.58  | Vasospasm up vs No vasospasm   |
| 1.79  | Vasospasm up vs No vasospasm   |
| 2.00  | Vasospasm up vs No vasospasm   |
| -1.27 | Vasospasm down vs No vasospasm |
| -1.28 | Vasospasm down vs No vasospasm |
| -1.23 | Vasospasm down vs No vasospasm |
| -1.46 | Vasospasm down vs No vasospasm |
| -1.45 | Vasospasm down vs No vasospasm |
| -1.55 | Vasospasm down vs No vasospasm |
| -1.59 | Vasospasm down vs No vasospasm |
| 1.21  | Vasospasm up vs No vasospasm   |
| -1.35 | Vasospasm down vs No vasospasm |
| -1.33 | Vasospasm down vs No vasospasm |
| -1.26 | Vasospasm down vs No vasospasm |
| 1.34  | Vasospasm up vs No vasospasm   |
| 1.53  | Vasospasm up vs No vasospasm   |
| -1.71 | Vasospasm down vs No vasospasm |
| -1.68 | Vasospasm down vs No vasospasm |
| 1.58  | Vasospasm up vs No vasospasm   |
| -1.22 | Vasospasm down vs No vasospasm |
| -1.30 | Vasospasm down vs No vasospasm |
| -1.50 | Vasospasm down vs No vasospasm |
| 2.06  | Vasospasm up vs No vasospasm   |
| -1.51 | Vasospasm down vs No vasospasm |
| -1.22 | Vasospasm down vs No vasospasm |
| -1.29 | Vasospasm down vs No vasospasm |
| 1.63  | Vasospasm up vs No vasospasm   |
| 1.30  | Vasospasm up vs No vasospasm   |
| 1.59  | Vasospasm up vs No vasospasm   |
| -1.51 | Vasospasm down vs No vasospasm |
| -1.60 | Vasospasm down vs No vasospasm |

|       |                                |
|-------|--------------------------------|
| 1.57  | Vasospasm up vs No vasospasm   |
| -1.29 | Vasospasm down vs No vasospasm |
| -1.28 | Vasospasm down vs No vasospasm |
| -1.36 | Vasospasm down vs No vasospasm |
| -1.57 | Vasospasm down vs No vasospasm |
| 1.70  | Vasospasm up vs No vasospasm   |
| -1.48 | Vasospasm down vs No vasospasm |
| -1.24 | Vasospasm down vs No vasospasm |
| 1.25  | Vasospasm up vs No vasospasm   |
| -1.38 | Vasospasm down vs No vasospasm |
| 1.80  | Vasospasm up vs No vasospasm   |
| -1.27 | Vasospasm down vs No vasospasm |
| -1.27 | Vasospasm down vs No vasospasm |
| -1.37 | Vasospasm down vs No vasospasm |
| 1.44  | Vasospasm up vs No vasospasm   |
| -1.35 | Vasospasm down vs No vasospasm |
| -1.32 | Vasospasm down vs No vasospasm |
| -1.31 | Vasospasm down vs No vasospasm |
| -1.22 | Vasospasm down vs No vasospasm |
| 1.69  | Vasospasm up vs No vasospasm   |
| -1.48 | Vasospasm down vs No vasospasm |
| -1.23 | Vasospasm down vs No vasospasm |
| 1.38  | Vasospasm up vs No vasospasm   |
| -1.23 | Vasospasm down vs No vasospasm |
| -1.26 | Vasospasm down vs No vasospasm |
| 1.64  | Vasospasm up vs No vasospasm   |
| -1.38 | Vasospasm down vs No vasospasm |
| 1.72  | Vasospasm up vs No vasospasm   |
| 1.50  | Vasospasm up vs No vasospasm   |
| 1.42  | Vasospasm up vs No vasospasm   |
| -1.26 | Vasospasm down vs No vasospasm |
| 1.32  | Vasospasm up vs No vasospasm   |
| -1.48 | Vasospasm down vs No vasospasm |
| 2.29  | Vasospasm up vs No vasospasm   |
| 1.50  | Vasospasm up vs No vasospasm   |
| 1.50  | Vasospasm up vs No vasospasm   |
| -1.25 | Vasospasm down vs No vasospasm |
| -1.32 | Vasospasm down vs No vasospasm |
| 1.22  | Vasospasm up vs No vasospasm   |
| -1.41 | Vasospasm down vs No vasospasm |
| 1.80  | Vasospasm up vs No vasospasm   |
| -1.20 | Vasospasm down vs No vasospasm |
| -1.41 | Vasospasm down vs No vasospasm |
| -1.37 | Vasospasm down vs No vasospasm |
| -1.26 | Vasospasm down vs No vasospasm |
| 1.33  | Vasospasm up vs No vasospasm   |
| -1.26 | Vasospasm down vs No vasospasm |

|       |                                |
|-------|--------------------------------|
| -1.30 | Vasospasm down vs No vasospasm |
| -1.41 | Vasospasm down vs No vasospasm |
| -1.57 | Vasospasm down vs No vasospasm |
| -1.26 | Vasospasm down vs No vasospasm |
| -1.45 | Vasospasm down vs No vasospasm |
| -1.31 | Vasospasm down vs No vasospasm |
| 1.68  | Vasospasm up vs No vasospasm   |
| -1.44 | Vasospasm down vs No vasospasm |
| 1.39  | Vasospasm up vs No vasospasm   |
| -1.26 | Vasospasm down vs No vasospasm |
| 1.35  | Vasospasm up vs No vasospasm   |
| -1.26 | Vasospasm down vs No vasospasm |
| -1.30 | Vasospasm down vs No vasospasm |
| -1.34 | Vasospasm down vs No vasospasm |
| -1.35 | Vasospasm down vs No vasospasm |
| -1.42 | Vasospasm down vs No vasospasm |
| -1.42 | Vasospasm down vs No vasospasm |
| -1.62 | Vasospasm down vs No vasospasm |
| 1.40  | Vasospasm up vs No vasospasm   |
| -1.49 | Vasospasm down vs No vasospasm |
| -1.34 | Vasospasm down vs No vasospasm |
| -1.47 | Vasospasm down vs No vasospasm |
| 1.40  | Vasospasm up vs No vasospasm   |
| -1.28 | Vasospasm down vs No vasospasm |
| 1.48  | Vasospasm up vs No vasospasm   |
| -1.45 | Vasospasm down vs No vasospasm |
| -1.48 | Vasospasm down vs No vasospasm |
| -1.76 | Vasospasm down vs No vasospasm |
| 1.39  | Vasospasm up vs No vasospasm   |
| -1.65 | Vasospasm down vs No vasospasm |
| -1.38 | Vasospasm down vs No vasospasm |
| 1.53  | Vasospasm up vs No vasospasm   |
| 1.51  | Vasospasm up vs No vasospasm   |
| 1.55  | Vasospasm up vs No vasospasm   |
| -1.57 | Vasospasm down vs No vasospasm |
| 1.66  | Vasospasm up vs No vasospasm   |
| -1.34 | Vasospasm down vs No vasospasm |
| -1.48 | Vasospasm down vs No vasospasm |
| -1.25 | Vasospasm down vs No vasospasm |
| -1.29 | Vasospasm down vs No vasospasm |
| -1.22 | Vasospasm down vs No vasospasm |
| -1.32 | Vasospasm down vs No vasospasm |
| 1.95  | Vasospasm up vs No vasospasm   |
| -1.32 | Vasospasm down vs No vasospasm |
| -1.66 | Vasospasm down vs No vasospasm |
| 1.62  | Vasospasm up vs No vasospasm   |
| -1.25 | Vasospasm down vs No vasospasm |



|       |                                |
|-------|--------------------------------|
| -1.31 | Vasospasm down vs No vasospasm |
| -1.26 | Vasospasm down vs No vasospasm |
| -1.41 | Vasospasm down vs No vasospasm |
| -1.29 | Vasospasm down vs No vasospasm |
| -1.20 | Vasospasm down vs No vasospasm |
| 1.39  | Vasospasm up vs No vasospasm   |
| -1.56 | Vasospasm down vs No vasospasm |
| -1.40 | Vasospasm down vs No vasospasm |
| -1.26 | Vasospasm down vs No vasospasm |
| -1.24 | Vasospasm down vs No vasospasm |
| -1.58 | Vasospasm down vs No vasospasm |
| -1.50 | Vasospasm down vs No vasospasm |
| -1.39 | Vasospasm down vs No vasospasm |
| 1.55  | Vasospasm up vs No vasospasm   |
| -1.42 | Vasospasm down vs No vasospasm |
| 1.39  | Vasospasm up vs No vasospasm   |
| -1.34 | Vasospasm down vs No vasospasm |
| -2.10 | Vasospasm down vs No vasospasm |
| -1.41 | Vasospasm down vs No vasospasm |
| -1.38 | Vasospasm down vs No vasospasm |
| -1.42 | Vasospasm down vs No vasospasm |
| -1.37 | Vasospasm down vs No vasospasm |
| 1.56  | Vasospasm up vs No vasospasm   |
| 1.77  | Vasospasm up vs No vasospasm   |
| 1.51  | Vasospasm up vs No vasospasm   |
| 1.34  | Vasospasm up vs No vasospasm   |
| -1.38 | Vasospasm down vs No vasospasm |
| -1.44 | Vasospasm down vs No vasospasm |
| -1.32 | Vasospasm down vs No vasospasm |
| -1.27 | Vasospasm down vs No vasospasm |
| 1.71  | Vasospasm up vs No vasospasm   |
| -1.23 | Vasospasm down vs No vasospasm |
| -1.24 | Vasospasm down vs No vasospasm |
| 1.36  | Vasospasm up vs No vasospasm   |
| -1.55 | Vasospasm down vs No vasospasm |
| 1.32  | Vasospasm up vs No vasospasm   |
| -1.29 | Vasospasm down vs No vasospasm |
| -1.30 | Vasospasm down vs No vasospasm |
| 1.36  | Vasospasm up vs No vasospasm   |
| 1.45  | Vasospasm up vs No vasospasm   |
| 1.45  | Vasospasm up vs No vasospasm   |
| -1.49 | Vasospasm down vs No vasospasm |
| -1.43 | Vasospasm down vs No vasospasm |
| 1.30  | Vasospasm up vs No vasospasm   |
| -1.45 | Vasospasm down vs No vasospasm |
| -1.24 | Vasospasm down vs No vasospasm |
| -1.43 | Vasospasm down vs No vasospasm |

|       |                                |
|-------|--------------------------------|
| -1.26 | Vasospasm down vs No vasospasm |
| 1.59  | Vasospasm up vs No vasospasm   |
| -1.58 | Vasospasm down vs No vasospasm |
| 1.22  | Vasospasm up vs No vasospasm   |
| -1.47 | Vasospasm down vs No vasospasm |
| -1.69 | Vasospasm down vs No vasospasm |
| 1.54  | Vasospasm up vs No vasospasm   |
| -1.62 | Vasospasm down vs No vasospasm |
| 1.31  | Vasospasm up vs No vasospasm   |
| -1.37 | Vasospasm down vs No vasospasm |
| 2.22  | Vasospasm up vs No vasospasm   |
| -1.35 | Vasospasm down vs No vasospasm |
| -1.26 | Vasospasm down vs No vasospasm |
| -1.31 | Vasospasm down vs No vasospasm |
| -1.35 | Vasospasm down vs No vasospasm |
| -1.20 | Vasospasm down vs No vasospasm |
| -1.51 | Vasospasm down vs No vasospasm |
| -1.82 | Vasospasm down vs No vasospasm |
| 1.25  | Vasospasm up vs No vasospasm   |
| 1.42  | Vasospasm up vs No vasospasm   |
| -1.26 | Vasospasm down vs No vasospasm |
| -1.38 | Vasospasm down vs No vasospasm |
| 2.20  | Vasospasm up vs No vasospasm   |
| -1.42 | Vasospasm down vs No vasospasm |
| -1.49 | Vasospasm down vs No vasospasm |
| -1.45 | Vasospasm down vs No vasospasm |
| 1.39  | Vasospasm up vs No vasospasm   |
| -1.22 | Vasospasm down vs No vasospasm |
| -1.54 | Vasospasm down vs No vasospasm |
| 1.86  | Vasospasm up vs No vasospasm   |
| 1.71  | Vasospasm up vs No vasospasm   |
| -1.47 | Vasospasm down vs No vasospasm |
| -1.58 | Vasospasm down vs No vasospasm |
| -1.63 | Vasospasm down vs No vasospasm |
| -1.33 | Vasospasm down vs No vasospasm |
| -1.22 | Vasospasm down vs No vasospasm |
| -1.58 | Vasospasm down vs No vasospasm |
| -1.61 | Vasospasm down vs No vasospasm |
| -1.24 | Vasospasm down vs No vasospasm |
| 1.40  | Vasospasm up vs No vasospasm   |
| 1.28  | Vasospasm up vs No vasospasm   |
| 1.99  | Vasospasm up vs No vasospasm   |
| -1.37 | Vasospasm down vs No vasospasm |
| 1.34  | Vasospasm up vs No vasospasm   |
| -1.30 | Vasospasm down vs No vasospasm |
| -1.29 | Vasospasm down vs No vasospasm |
| 1.20  | Vasospasm up vs No vasospasm   |

|       |                                |
|-------|--------------------------------|
| 1.27  | Vasospasm up vs No vasospasm   |
| -1.22 | Vasospasm down vs No vasospasm |
| -1.80 | Vasospasm down vs No vasospasm |
| -1.65 | Vasospasm down vs No vasospasm |
| 1.30  | Vasospasm up vs No vasospasm   |
| -1.35 | Vasospasm down vs No vasospasm |
| -1.26 | Vasospasm down vs No vasospasm |
| -1.33 | Vasospasm down vs No vasospasm |
| 1.45  | Vasospasm up vs No vasospasm   |
| -1.47 | Vasospasm down vs No vasospasm |
| -1.35 | Vasospasm down vs No vasospasm |
| 1.25  | Vasospasm up vs No vasospasm   |
| -1.35 | Vasospasm down vs No vasospasm |
| -1.37 | Vasospasm down vs No vasospasm |
| 1.36  | Vasospasm up vs No vasospasm   |
| -1.23 | Vasospasm down vs No vasospasm |
| -1.91 | Vasospasm down vs No vasospasm |
| 1.42  | Vasospasm up vs No vasospasm   |
| 2.29  | Vasospasm up vs No vasospasm   |
| -1.33 | Vasospasm down vs No vasospasm |
| -1.24 | Vasospasm down vs No vasospasm |
| -1.23 | Vasospasm down vs No vasospasm |
| 1.70  | Vasospasm up vs No vasospasm   |
| -1.35 | Vasospasm down vs No vasospasm |
| -1.38 | Vasospasm down vs No vasospasm |
| -1.25 | Vasospasm down vs No vasospasm |
| -1.29 | Vasospasm down vs No vasospasm |
| -1.57 | Vasospasm down vs No vasospasm |
| 1.72  | Vasospasm up vs No vasospasm   |
| -1.38 | Vasospasm down vs No vasospasm |
| -1.44 | Vasospasm down vs No vasospasm |
| -1.34 | Vasospasm down vs No vasospasm |
| 1.42  | Vasospasm up vs No vasospasm   |
| 1.74  | Vasospasm up vs No vasospasm   |
| -1.33 | Vasospasm down vs No vasospasm |
| -1.33 | Vasospasm down vs No vasospasm |
| 1.53  | Vasospasm up vs No vasospasm   |
| -1.51 | Vasospasm down vs No vasospasm |
| -1.39 | Vasospasm down vs No vasospasm |
| -1.34 | Vasospasm down vs No vasospasm |
| -1.31 | Vasospasm down vs No vasospasm |
| -1.46 | Vasospasm down vs No vasospasm |
| 1.55  | Vasospasm up vs No vasospasm   |
| -1.57 | Vasospasm down vs No vasospasm |
| 1.30  | Vasospasm up vs No vasospasm   |
| -1.41 | Vasospasm down vs No vasospasm |
| -1.58 | Vasospasm down vs No vasospasm |

|       |                                |
|-------|--------------------------------|
| -1.54 | Vasospasm down vs No vasospasm |
| -1.44 | Vasospasm down vs No vasospasm |
| -1.30 | Vasospasm down vs No vasospasm |
| -1.42 | Vasospasm down vs No vasospasm |
| -1.52 | Vasospasm down vs No vasospasm |
| 1.59  | Vasospasm up vs No vasospasm   |
| -1.38 | Vasospasm down vs No vasospasm |
| 1.53  | Vasospasm up vs No vasospasm   |
| -1.66 | Vasospasm down vs No vasospasm |
| 1.29  | Vasospasm up vs No vasospasm   |
| -1.49 | Vasospasm down vs No vasospasm |
| -1.51 | Vasospasm down vs No vasospasm |
| 1.97  | Vasospasm up vs No vasospasm   |
| -1.40 | Vasospasm down vs No vasospasm |
| -1.84 | Vasospasm down vs No vasospasm |
| -1.65 | Vasospasm down vs No vasospasm |
| -1.28 | Vasospasm down vs No vasospasm |
| 1.62  | Vasospasm up vs No vasospasm   |
| -1.41 | Vasospasm down vs No vasospasm |
| -1.27 | Vasospasm down vs No vasospasm |
| 1.39  | Vasospasm up vs No vasospasm   |
| -1.56 | Vasospasm down vs No vasospasm |
| -1.22 | Vasospasm down vs No vasospasm |
| 1.36  | Vasospasm up vs No vasospasm   |
| -1.45 | Vasospasm down vs No vasospasm |
| -1.27 | Vasospasm down vs No vasospasm |
| -1.47 | Vasospasm down vs No vasospasm |
| 1.37  | Vasospasm up vs No vasospasm   |
| -1.33 | Vasospasm down vs No vasospasm |
| -1.21 | Vasospasm down vs No vasospasm |
| -1.29 | Vasospasm down vs No vasospasm |
| -1.28 | Vasospasm down vs No vasospasm |
| 1.39  | Vasospasm up vs No vasospasm   |
| -1.35 | Vasospasm down vs No vasospasm |
| -1.30 | Vasospasm down vs No vasospasm |
| 1.48  | Vasospasm up vs No vasospasm   |
| -1.38 | Vasospasm down vs No vasospasm |
| 1.47  | Vasospasm up vs No vasospasm   |
| -1.42 | Vasospasm down vs No vasospasm |
| -1.41 | Vasospasm down vs No vasospasm |
| -1.21 | Vasospasm down vs No vasospasm |
| -1.48 | Vasospasm down vs No vasospasm |
| 1.49  | Vasospasm up vs No vasospasm   |
| 1.29  | Vasospasm up vs No vasospasm   |
| 1.41  | Vasospasm up vs No vasospasm   |
| 1.36  | Vasospasm up vs No vasospasm   |
| -1.39 | Vasospasm down vs No vasospasm |

|       |                                |
|-------|--------------------------------|
| -1.52 | Vasospasm down vs No vasospasm |
| -1.45 | Vasospasm down vs No vasospasm |
| 1.68  | Vasospasm up vs No vasospasm   |
| -1.38 | Vasospasm down vs No vasospasm |
| -1.39 | Vasospasm down vs No vasospasm |
| -1.33 | Vasospasm down vs No vasospasm |
| -1.29 | Vasospasm down vs No vasospasm |
| -1.45 | Vasospasm down vs No vasospasm |
| 1.32  | Vasospasm up vs No vasospasm   |
| -1.42 | Vasospasm down vs No vasospasm |
| -1.30 | Vasospasm down vs No vasospasm |
| -1.40 | Vasospasm down vs No vasospasm |
| -1.38 | Vasospasm down vs No vasospasm |
| 1.35  | Vasospasm up vs No vasospasm   |
| 1.25  | Vasospasm up vs No vasospasm   |
| -1.37 | Vasospasm down vs No vasospasm |
| 1.73  | Vasospasm up vs No vasospasm   |
| -1.31 | Vasospasm down vs No vasospasm |
| 1.40  | Vasospasm up vs No vasospasm   |
| -1.44 | Vasospasm down vs No vasospasm |
| -1.36 | Vasospasm down vs No vasospasm |
| -1.29 | Vasospasm down vs No vasospasm |
| -1.36 | Vasospasm down vs No vasospasm |
| -1.38 | Vasospasm down vs No vasospasm |
| 1.32  | Vasospasm up vs No vasospasm   |
| -1.23 | Vasospasm down vs No vasospasm |
| -1.43 | Vasospasm down vs No vasospasm |
| -1.49 | Vasospasm down vs No vasospasm |
| -1.52 | Vasospasm down vs No vasospasm |
| 1.25  | Vasospasm up vs No vasospasm   |
| -1.35 | Vasospasm down vs No vasospasm |
| -1.52 | Vasospasm down vs No vasospasm |
| -2.23 | Vasospasm down vs No vasospasm |
| -1.33 | Vasospasm down vs No vasospasm |
| -1.26 | Vasospasm down vs No vasospasm |
| 1.61  | Vasospasm up vs No vasospasm   |
| -1.32 | Vasospasm down vs No vasospasm |
| -1.37 | Vasospasm down vs No vasospasm |
| -1.22 | Vasospasm down vs No vasospasm |
| -1.45 | Vasospasm down vs No vasospasm |
| -1.50 | Vasospasm down vs No vasospasm |
| 1.29  | Vasospasm up vs No vasospasm   |
| 1.40  | Vasospasm up vs No vasospasm   |
| 1.51  | Vasospasm up vs No vasospasm   |
| 1.58  | Vasospasm up vs No vasospasm   |
| -1.34 | Vasospasm down vs No vasospasm |
| 1.29  | Vasospasm up vs No vasospasm   |

|       |                                |
|-------|--------------------------------|
| -1.37 | Vasospasm down vs No vasospasm |
| 1.48  | Vasospasm up vs No vasospasm   |
| 1.60  | Vasospasm up vs No vasospasm   |
| -1.24 | Vasospasm down vs No vasospasm |
| -1.25 | Vasospasm down vs No vasospasm |
| 1.56  | Vasospasm up vs No vasospasm   |
| -1.28 | Vasospasm down vs No vasospasm |
| 2.25  | Vasospasm up vs No vasospasm   |
| -1.29 | Vasospasm down vs No vasospasm |
| -1.39 | Vasospasm down vs No vasospasm |
| -1.47 | Vasospasm down vs No vasospasm |
| 2.02  | Vasospasm up vs No vasospasm   |
| 1.84  | Vasospasm up vs No vasospasm   |
| -1.44 | Vasospasm down vs No vasospasm |
| -1.52 | Vasospasm down vs No vasospasm |
| -1.47 | Vasospasm down vs No vasospasm |
| 1.36  | Vasospasm up vs No vasospasm   |
| -1.26 | Vasospasm down vs No vasospasm |
| 1.32  | Vasospasm up vs No vasospasm   |
| -1.37 | Vasospasm down vs No vasospasm |
| 1.59  | Vasospasm up vs No vasospasm   |
| -1.41 | Vasospasm down vs No vasospasm |
| -1.23 | Vasospasm down vs No vasospasm |
| -1.27 | Vasospasm down vs No vasospasm |
| -1.44 | Vasospasm down vs No vasospasm |
| -1.39 | Vasospasm down vs No vasospasm |
| 1.42  | Vasospasm up vs No vasospasm   |
| -1.65 | Vasospasm down vs No vasospasm |
| 1.45  | Vasospasm up vs No vasospasm   |
| -1.43 | Vasospasm down vs No vasospasm |
| -1.22 | Vasospasm down vs No vasospasm |
| -1.21 | Vasospasm down vs No vasospasm |
| -1.51 | Vasospasm down vs No vasospasm |
| -1.26 | Vasospasm down vs No vasospasm |
| 1.88  | Vasospasm up vs No vasospasm   |
| -1.43 | Vasospasm down vs No vasospasm |
| 1.47  | Vasospasm up vs No vasospasm   |
| 1.57  | Vasospasm up vs No vasospasm   |
| -1.51 | Vasospasm down vs No vasospasm |
| -1.44 | Vasospasm down vs No vasospasm |
| -1.39 | Vasospasm down vs No vasospasm |
| -1.26 | Vasospasm down vs No vasospasm |
| -1.39 | Vasospasm down vs No vasospasm |
| -1.27 | Vasospasm down vs No vasospasm |
| 1.22  | Vasospasm up vs No vasospasm   |
| 1.45  | Vasospasm up vs No vasospasm   |
| -1.21 | Vasospasm down vs No vasospasm |

|       |                                |
|-------|--------------------------------|
| -1.44 | Vasospasm down vs No vasospasm |
| 1.64  | Vasospasm up vs No vasospasm   |
| -1.35 | Vasospasm down vs No vasospasm |
| -1.31 | Vasospasm down vs No vasospasm |
| -1.49 | Vasospasm down vs No vasospasm |
| 1.60  | Vasospasm up vs No vasospasm   |
| -1.39 | Vasospasm down vs No vasospasm |
| -1.53 | Vasospasm down vs No vasospasm |
| -1.57 | Vasospasm down vs No vasospasm |
| -1.23 | Vasospasm down vs No vasospasm |
| -1.41 | Vasospasm down vs No vasospasm |
| -1.39 | Vasospasm down vs No vasospasm |
| -1.46 | Vasospasm down vs No vasospasm |
| -1.27 | Vasospasm down vs No vasospasm |
| 1.28  | Vasospasm up vs No vasospasm   |
| 1.30  | Vasospasm up vs No vasospasm   |
| 1.25  | Vasospasm up vs No vasospasm   |
| 1.66  | Vasospasm up vs No vasospasm   |
| 1.40  | Vasospasm up vs No vasospasm   |
| 1.37  | Vasospasm up vs No vasospasm   |
| -1.26 | Vasospasm down vs No vasospasm |
| -1.62 | Vasospasm down vs No vasospasm |
| -1.36 | Vasospasm down vs No vasospasm |
| -1.21 | Vasospasm down vs No vasospasm |
| -1.45 | Vasospasm down vs No vasospasm |
| 1.75  | Vasospasm up vs No vasospasm   |
| -1.35 | Vasospasm down vs No vasospasm |
| -1.41 | Vasospasm down vs No vasospasm |
| 1.68  | Vasospasm up vs No vasospasm   |
| -1.45 | Vasospasm down vs No vasospasm |
| -1.22 | Vasospasm down vs No vasospasm |
| -1.35 | Vasospasm down vs No vasospasm |
| -1.28 | Vasospasm down vs No vasospasm |
| -1.50 | Vasospasm down vs No vasospasm |
| -1.34 | Vasospasm down vs No vasospasm |
| -1.30 | Vasospasm down vs No vasospasm |
| 1.33  | Vasospasm up vs No vasospasm   |
| 1.63  | Vasospasm up vs No vasospasm   |
| -1.20 | Vasospasm down vs No vasospasm |
| 1.54  | Vasospasm up vs No vasospasm   |
| 1.87  | Vasospasm up vs No vasospasm   |
| -1.32 | Vasospasm down vs No vasospasm |
| -1.34 | Vasospasm down vs No vasospasm |
| -1.29 | Vasospasm down vs No vasospasm |
| 1.61  | Vasospasm up vs No vasospasm   |
| 1.50  | Vasospasm up vs No vasospasm   |
| 1.54  | Vasospasm up vs No vasospasm   |

|       |                                |
|-------|--------------------------------|
| -1.34 | Vasospasm down vs No vasospasm |
| -1.23 | Vasospasm down vs No vasospasm |
| -1.40 | Vasospasm down vs No vasospasm |
| 1.42  | Vasospasm up vs No vasospasm   |
| -1.38 | Vasospasm down vs No vasospasm |
| -1.31 | Vasospasm down vs No vasospasm |
| -1.33 | Vasospasm down vs No vasospasm |
| -1.21 | Vasospasm down vs No vasospasm |
| 1.48  | Vasospasm up vs No vasospasm   |
| -1.39 | Vasospasm down vs No vasospasm |
| -1.25 | Vasospasm down vs No vasospasm |
| -1.23 | Vasospasm down vs No vasospasm |
| -1.32 | Vasospasm down vs No vasospasm |
| 1.53  | Vasospasm up vs No vasospasm   |
| 1.43  | Vasospasm up vs No vasospasm   |
| 1.66  | Vasospasm up vs No vasospasm   |
| -1.21 | Vasospasm down vs No vasospasm |
| -1.24 | Vasospasm down vs No vasospasm |
| -1.26 | Vasospasm down vs No vasospasm |
| 1.44  | Vasospasm up vs No vasospasm   |
| -1.56 | Vasospasm down vs No vasospasm |
| -1.33 | Vasospasm down vs No vasospasm |
| 1.67  | Vasospasm up vs No vasospasm   |
| 1.73  | Vasospasm up vs No vasospasm   |
| 1.76  | Vasospasm up vs No vasospasm   |
| -1.21 | Vasospasm down vs No vasospasm |
| -1.26 | Vasospasm down vs No vasospasm |
| -1.22 | Vasospasm down vs No vasospasm |
| -1.41 | Vasospasm down vs No vasospasm |
| -1.35 | Vasospasm down vs No vasospasm |
| -1.33 | Vasospasm down vs No vasospasm |
| -1.29 | Vasospasm down vs No vasospasm |
| 1.51  | Vasospasm up vs No vasospasm   |
| -1.37 | Vasospasm down vs No vasospasm |
| -1.30 | Vasospasm down vs No vasospasm |
| -1.40 | Vasospasm down vs No vasospasm |
| -1.39 | Vasospasm down vs No vasospasm |
| 1.25  | Vasospasm up vs No vasospasm   |
| -1.35 | Vasospasm down vs No vasospasm |
| 1.64  | Vasospasm up vs No vasospasm   |
| -1.43 | Vasospasm down vs No vasospasm |
| 1.67  | Vasospasm up vs No vasospasm   |
| 1.25  | Vasospasm up vs No vasospasm   |
| 1.25  | Vasospasm up vs No vasospasm   |
| 1.42  | Vasospasm up vs No vasospasm   |
| 1.65  | Vasospasm up vs No vasospasm   |
| 1.96  | Vasospasm up vs No vasospasm   |



|       |                                |
|-------|--------------------------------|
| -1.23 | Vasospasm down vs No vasospasm |
| 1.58  | Vasospasm up vs No vasospasm   |
| -1.21 | Vasospasm down vs No vasospasm |
| -1.39 | Vasospasm down vs No vasospasm |
| -1.48 | Vasospasm down vs No vasospasm |
| 1.29  | Vasospasm up vs No vasospasm   |
| -1.20 | Vasospasm down vs No vasospasm |
| -1.47 | Vasospasm down vs No vasospasm |
| 1.75  | Vasospasm up vs No vasospasm   |
| -1.23 | Vasospasm down vs No vasospasm |
| 1.26  | Vasospasm up vs No vasospasm   |
| -1.50 | Vasospasm down vs No vasospasm |
| 1.45  | Vasospasm up vs No vasospasm   |
| -1.31 | Vasospasm down vs No vasospasm |
| 1.54  | Vasospasm up vs No vasospasm   |
| -1.30 | Vasospasm down vs No vasospasm |
| -1.40 | Vasospasm down vs No vasospasm |
| -1.36 | Vasospasm down vs No vasospasm |
| -1.31 | Vasospasm down vs No vasospasm |
| -1.26 | Vasospasm down vs No vasospasm |
| 1.67  | Vasospasm up vs No vasospasm   |
| -1.38 | Vasospasm down vs No vasospasm |
| -1.29 | Vasospasm down vs No vasospasm |
| -1.28 | Vasospasm down vs No vasospasm |
| -1.40 | Vasospasm down vs No vasospasm |
| 1.63  | Vasospasm up vs No vasospasm   |
| 1.33  | Vasospasm up vs No vasospasm   |
| -1.48 | Vasospasm down vs No vasospasm |
| 1.86  | Vasospasm up vs No vasospasm   |
| 1.34  | Vasospasm up vs No vasospasm   |
| -1.37 | Vasospasm down vs No vasospasm |
| 1.68  | Vasospasm up vs No vasospasm   |
| -1.32 | Vasospasm down vs No vasospasm |
| -1.35 | Vasospasm down vs No vasospasm |
| -1.23 | Vasospasm down vs No vasospasm |
| -1.31 | Vasospasm down vs No vasospasm |
| -1.21 | Vasospasm down vs No vasospasm |
| -1.23 | Vasospasm down vs No vasospasm |
| -1.40 | Vasospasm down vs No vasospasm |
| -1.55 | Vasospasm down vs No vasospasm |
| -1.40 | Vasospasm down vs No vasospasm |
| 1.85  | Vasospasm up vs No vasospasm   |
| 1.55  | Vasospasm up vs No vasospasm   |
| 1.65  | Vasospasm up vs No vasospasm   |
| 1.66  | Vasospasm up vs No vasospasm   |
| -1.37 | Vasospasm down vs No vasospasm |
| 1.63  | Vasospasm up vs No vasospasm   |

|       |                                |
|-------|--------------------------------|
| -1.36 | Vasospasm down vs No vasospasm |
| 1.47  | Vasospasm up vs No vasospasm   |
| -1.34 | Vasospasm down vs No vasospasm |
| -1.34 | Vasospasm down vs No vasospasm |
| 1.64  | Vasospasm up vs No vasospasm   |
| 1.50  | Vasospasm up vs No vasospasm   |
| -1.24 | Vasospasm down vs No vasospasm |
| -1.42 | Vasospasm down vs No vasospasm |
| -1.34 | Vasospasm down vs No vasospasm |
| -1.21 | Vasospasm down vs No vasospasm |
| -1.44 | Vasospasm down vs No vasospasm |
| 1.28  | Vasospasm up vs No vasospasm   |
| 1.61  | Vasospasm up vs No vasospasm   |
| 1.39  | Vasospasm up vs No vasospasm   |
| -1.37 | Vasospasm down vs No vasospasm |
| 1.28  | Vasospasm up vs No vasospasm   |
| -1.20 | Vasospasm down vs No vasospasm |
| -1.34 | Vasospasm down vs No vasospasm |
| -1.24 | Vasospasm down vs No vasospasm |
| -1.23 | Vasospasm down vs No vasospasm |
| 1.60  | Vasospasm up vs No vasospasm   |
| -1.45 | Vasospasm down vs No vasospasm |
| 1.53  | Vasospasm up vs No vasospasm   |
| -1.31 | Vasospasm down vs No vasospasm |
| -1.40 | Vasospasm down vs No vasospasm |
| -1.59 | Vasospasm down vs No vasospasm |
| -1.26 | Vasospasm down vs No vasospasm |
| 1.35  | Vasospasm up vs No vasospasm   |
| -1.28 | Vasospasm down vs No vasospasm |
| 1.42  | Vasospasm up vs No vasospasm   |
| -1.33 | Vasospasm down vs No vasospasm |
| 1.41  | Vasospasm up vs No vasospasm   |
| -1.36 | Vasospasm down vs No vasospasm |
| 1.31  | Vasospasm up vs No vasospasm   |
| -1.40 | Vasospasm down vs No vasospasm |
| -1.26 | Vasospasm down vs No vasospasm |
| 1.31  | Vasospasm up vs No vasospasm   |
| 1.41  | Vasospasm up vs No vasospasm   |
| -1.35 | Vasospasm down vs No vasospasm |
| 1.56  | Vasospasm up vs No vasospasm   |
| -1.28 | Vasospasm down vs No vasospasm |
| -1.28 | Vasospasm down vs No vasospasm |
| -1.33 | Vasospasm down vs No vasospasm |
| 1.48  | Vasospasm up vs No vasospasm   |
| 1.35  | Vasospasm up vs No vasospasm   |
| 1.79  | Vasospasm up vs No vasospasm   |
| -1.28 | Vasospasm down vs No vasospasm |

|       |                                |
|-------|--------------------------------|
| -1.62 | Vasospasm down vs No vasospasm |
| -1.27 | Vasospasm down vs No vasospasm |
| -1.25 | Vasospasm down vs No vasospasm |
| 1.43  | Vasospasm up vs No vasospasm   |
| -1.32 | Vasospasm down vs No vasospasm |
| -1.22 | Vasospasm down vs No vasospasm |
| -1.36 | Vasospasm down vs No vasospasm |
| -1.28 | Vasospasm down vs No vasospasm |
| 1.54  | Vasospasm up vs No vasospasm   |
| -1.24 | Vasospasm down vs No vasospasm |
| -1.35 | Vasospasm down vs No vasospasm |
| -1.27 | Vasospasm down vs No vasospasm |
| 1.70  | Vasospasm up vs No vasospasm   |
| 1.37  | Vasospasm up vs No vasospasm   |
| -1.22 | Vasospasm down vs No vasospasm |
| -1.23 | Vasospasm down vs No vasospasm |
| 1.65  | Vasospasm up vs No vasospasm   |
| -1.31 | Vasospasm down vs No vasospasm |
| -1.25 | Vasospasm down vs No vasospasm |
| 1.44  | Vasospasm up vs No vasospasm   |
| -1.57 | Vasospasm down vs No vasospasm |
| -1.24 | Vasospasm down vs No vasospasm |
| -1.21 | Vasospasm down vs No vasospasm |
| 1.36  | Vasospasm up vs No vasospasm   |
| 1.23  | Vasospasm up vs No vasospasm   |
| 1.57  | Vasospasm up vs No vasospasm   |
| -1.26 | Vasospasm down vs No vasospasm |
| 1.38  | Vasospasm up vs No vasospasm   |
| -1.44 | Vasospasm down vs No vasospasm |
| -1.21 | Vasospasm down vs No vasospasm |
| -1.52 | Vasospasm down vs No vasospasm |
| -1.36 | Vasospasm down vs No vasospasm |
| -1.37 | Vasospasm down vs No vasospasm |
| -1.40 | Vasospasm down vs No vasospasm |
| -1.32 | Vasospasm down vs No vasospasm |
| -1.23 | Vasospasm down vs No vasospasm |
| 1.39  | Vasospasm up vs No vasospasm   |
| -1.45 | Vasospasm down vs No vasospasm |
| 1.37  | Vasospasm up vs No vasospasm   |
| 1.51  | Vasospasm up vs No vasospasm   |
| -1.29 | Vasospasm down vs No vasospasm |
| -1.46 | Vasospasm down vs No vasospasm |
| -1.33 | Vasospasm down vs No vasospasm |
| 1.50  | Vasospasm up vs No vasospasm   |
| -1.30 | Vasospasm down vs No vasospasm |
| 1.58  | Vasospasm up vs No vasospasm   |
| 1.49  | Vasospasm up vs No vasospasm   |

|       |                                |
|-------|--------------------------------|
| -1.36 | Vasospasm down vs No vasospasm |
| -1.27 | Vasospasm down vs No vasospasm |
| 1.38  | Vasospasm up vs No vasospasm   |
| -1.38 | Vasospasm down vs No vasospasm |
| -1.36 | Vasospasm down vs No vasospasm |
| 1.31  | Vasospasm up vs No vasospasm   |
| -1.33 | Vasospasm down vs No vasospasm |
| -1.67 | Vasospasm down vs No vasospasm |
| 1.42  | Vasospasm up vs No vasospasm   |
| -1.45 | Vasospasm down vs No vasospasm |
| -1.28 | Vasospasm down vs No vasospasm |
| 1.21  | Vasospasm up vs No vasospasm   |
| -1.22 | Vasospasm down vs No vasospasm |
| -1.28 | Vasospasm down vs No vasospasm |
| 1.25  | Vasospasm up vs No vasospasm   |
| -1.43 | Vasospasm down vs No vasospasm |
| -1.29 | Vasospasm down vs No vasospasm |
| -1.31 | Vasospasm down vs No vasospasm |
| -1.29 | Vasospasm down vs No vasospasm |
| -1.54 | Vasospasm down vs No vasospasm |
| -1.45 | Vasospasm down vs No vasospasm |
| 1.54  | Vasospasm up vs No vasospasm   |
| -1.48 | Vasospasm down vs No vasospasm |
| -1.22 | Vasospasm down vs No vasospasm |
| -1.22 | Vasospasm down vs No vasospasm |
| -1.28 | Vasospasm down vs No vasospasm |
| 1.52  | Vasospasm up vs No vasospasm   |
| -1.21 | Vasospasm down vs No vasospasm |
| 1.66  | Vasospasm up vs No vasospasm   |
| -1.31 | Vasospasm down vs No vasospasm |
| 1.34  | Vasospasm up vs No vasospasm   |
| -1.38 | Vasospasm down vs No vasospasm |
| 1.53  | Vasospasm up vs No vasospasm   |
| -1.32 | Vasospasm down vs No vasospasm |
| 1.27  | Vasospasm up vs No vasospasm   |
| 1.45  | Vasospasm up vs No vasospasm   |
| -1.41 | Vasospasm down vs No vasospasm |
| 1.22  | Vasospasm up vs No vasospasm   |
| 1.32  | Vasospasm up vs No vasospasm   |
| -1.23 | Vasospasm down vs No vasospasm |
| -1.30 | Vasospasm down vs No vasospasm |
| -1.31 | Vasospasm down vs No vasospasm |
| -1.28 | Vasospasm down vs No vasospasm |
| -1.30 | Vasospasm down vs No vasospasm |
| 1.37  | Vasospasm up vs No vasospasm   |
| 1.31  | Vasospasm up vs No vasospasm   |
| -1.21 | Vasospasm down vs No vasospasm |

|       |                                |
|-------|--------------------------------|
| -1.45 | Vasospasm down vs No vasospasm |
| 1.26  | Vasospasm up vs No vasospasm   |
| 1.38  | Vasospasm up vs No vasospasm   |
| 1.67  | Vasospasm up vs No vasospasm   |
| 1.74  | Vasospasm up vs No vasospasm   |
| 1.69  | Vasospasm up vs No vasospasm   |
| -1.44 | Vasospasm down vs No vasospasm |
| -1.30 | Vasospasm down vs No vasospasm |
| 1.45  | Vasospasm up vs No vasospasm   |
| -1.32 | Vasospasm down vs No vasospasm |
| -1.23 | Vasospasm down vs No vasospasm |
| -1.41 | Vasospasm down vs No vasospasm |
| 1.50  | Vasospasm up vs No vasospasm   |
| -1.60 | Vasospasm down vs No vasospasm |
| -1.37 | Vasospasm down vs No vasospasm |
| 1.64  | Vasospasm up vs No vasospasm   |
| -1.33 | Vasospasm down vs No vasospasm |
| -1.39 | Vasospasm down vs No vasospasm |
| 1.30  | Vasospasm up vs No vasospasm   |
| -1.32 | Vasospasm down vs No vasospasm |
| -1.31 | Vasospasm down vs No vasospasm |
| 1.42  | Vasospasm up vs No vasospasm   |
| 1.30  | Vasospasm up vs No vasospasm   |
| 1.59  | Vasospasm up vs No vasospasm   |
| -1.60 | Vasospasm down vs No vasospasm |
| 1.61  | Vasospasm up vs No vasospasm   |
| -1.42 | Vasospasm down vs No vasospasm |
| -1.29 | Vasospasm down vs No vasospasm |
| -1.27 | Vasospasm down vs No vasospasm |
| -1.31 | Vasospasm down vs No vasospasm |
| -1.42 | Vasospasm down vs No vasospasm |
| 1.57  | Vasospasm up vs No vasospasm   |
| -1.22 | Vasospasm down vs No vasospasm |
| -1.54 | Vasospasm down vs No vasospasm |
| 1.95  | Vasospasm up vs No vasospasm   |
| 1.72  | Vasospasm up vs No vasospasm   |
| -1.31 | Vasospasm down vs No vasospasm |
| -1.41 | Vasospasm down vs No vasospasm |
| 1.36  | Vasospasm up vs No vasospasm   |
| 1.33  | Vasospasm up vs No vasospasm   |
| 1.28  | Vasospasm up vs No vasospasm   |
| 1.44  | Vasospasm up vs No vasospasm   |
| -1.36 | Vasospasm down vs No vasospasm |
| -1.21 | Vasospasm down vs No vasospasm |
| 1.63  | Vasospasm up vs No vasospasm   |
| 1.28  | Vasospasm up vs No vasospasm   |
| -1.34 | Vasospasm down vs No vasospasm |

|       |                                |
|-------|--------------------------------|
| -1.28 | Vasospasm down vs No vasospasm |
| 1.63  | Vasospasm up vs No vasospasm   |
| -1.26 | Vasospasm down vs No vasospasm |
| -1.21 | Vasospasm down vs No vasospasm |
| -1.22 | Vasospasm down vs No vasospasm |
| -1.37 | Vasospasm down vs No vasospasm |
| 1.51  | Vasospasm up vs No vasospasm   |
| 1.38  | Vasospasm up vs No vasospasm   |
| 1.22  | Vasospasm up vs No vasospasm   |
| 1.41  | Vasospasm up vs No vasospasm   |
| 1.46  | Vasospasm up vs No vasospasm   |
| 1.50  | Vasospasm up vs No vasospasm   |
| -1.63 | Vasospasm down vs No vasospasm |
| 1.52  | Vasospasm up vs No vasospasm   |
| 1.35  | Vasospasm up vs No vasospasm   |
| 1.28  | Vasospasm up vs No vasospasm   |
| 1.31  | Vasospasm up vs No vasospasm   |
| 1.85  | Vasospasm up vs No vasospasm   |
| -1.31 | Vasospasm down vs No vasospasm |
| -1.28 | Vasospasm down vs No vasospasm |
| 1.69  | Vasospasm up vs No vasospasm   |
| 1.47  | Vasospasm up vs No vasospasm   |
| 1.35  | Vasospasm up vs No vasospasm   |
| -1.33 | Vasospasm down vs No vasospasm |
| -1.34 | Vasospasm down vs No vasospasm |
| 1.28  | Vasospasm up vs No vasospasm   |
| 1.30  | Vasospasm up vs No vasospasm   |
| -1.54 | Vasospasm down vs No vasospasm |
| 1.48  | Vasospasm up vs No vasospasm   |
| 1.85  | Vasospasm up vs No vasospasm   |
| 1.36  | Vasospasm up vs No vasospasm   |
| -1.41 | Vasospasm down vs No vasospasm |
| -1.40 | Vasospasm down vs No vasospasm |
| -1.28 | Vasospasm down vs No vasospasm |
| 1.38  | Vasospasm up vs No vasospasm   |
| -1.39 | Vasospasm down vs No vasospasm |
| 1.61  | Vasospasm up vs No vasospasm   |
| 1.45  | Vasospasm up vs No vasospasm   |
| -1.25 | Vasospasm down vs No vasospasm |
| 1.45  | Vasospasm up vs No vasospasm   |
| 1.31  | Vasospasm up vs No vasospasm   |
| 1.41  | Vasospasm up vs No vasospasm   |
| 1.27  | Vasospasm up vs No vasospasm   |
| -1.23 | Vasospasm down vs No vasospasm |
| -1.29 | Vasospasm down vs No vasospasm |
| 1.29  | Vasospasm up vs No vasospasm   |
| -1.29 | Vasospasm down vs No vasospasm |

|       |                                |
|-------|--------------------------------|
| -1.40 | Vasospasm down vs No vasospasm |
| 1.58  | Vasospasm up vs No vasospasm   |
| 1.65  | Vasospasm up vs No vasospasm   |
| -1.25 | Vasospasm down vs No vasospasm |
| -1.42 | Vasospasm down vs No vasospasm |
| -1.23 | Vasospasm down vs No vasospasm |
| -1.47 | Vasospasm down vs No vasospasm |
| 1.70  | Vasospasm up vs No vasospasm   |
| 1.43  | Vasospasm up vs No vasospasm   |
| 1.21  | Vasospasm up vs No vasospasm   |
| -1.28 | Vasospasm down vs No vasospasm |
| -1.48 | Vasospasm down vs No vasospasm |
| -1.42 | Vasospasm down vs No vasospasm |
| -1.38 | Vasospasm down vs No vasospasm |
| -1.31 | Vasospasm down vs No vasospasm |
| 1.49  | Vasospasm up vs No vasospasm   |
| -1.38 | Vasospasm down vs No vasospasm |
| -1.50 | Vasospasm down vs No vasospasm |
| -1.33 | Vasospasm down vs No vasospasm |
| -1.32 | Vasospasm down vs No vasospasm |
| -1.20 | Vasospasm down vs No vasospasm |
| -1.71 | Vasospasm down vs No vasospasm |
| -1.61 | Vasospasm down vs No vasospasm |
| -1.32 | Vasospasm down vs No vasospasm |
| -1.37 | Vasospasm down vs No vasospasm |
| -1.35 | Vasospasm down vs No vasospasm |
| 1.56  | Vasospasm up vs No vasospasm   |
| -1.35 | Vasospasm down vs No vasospasm |
| -1.21 | Vasospasm down vs No vasospasm |
| 1.46  | Vasospasm up vs No vasospasm   |
| 1.49  | Vasospasm up vs No vasospasm   |
| -1.42 | Vasospasm down vs No vasospasm |
| -1.27 | Vasospasm down vs No vasospasm |
| 1.22  | Vasospasm up vs No vasospasm   |
| 1.27  | Vasospasm up vs No vasospasm   |
| 1.25  | Vasospasm up vs No vasospasm   |
| -1.45 | Vasospasm down vs No vasospasm |
| -1.26 | Vasospasm down vs No vasospasm |
| -1.22 | Vasospasm down vs No vasospasm |
| 1.37  | Vasospasm up vs No vasospasm   |
| 1.66  | Vasospasm up vs No vasospasm   |
| 1.50  | Vasospasm up vs No vasospasm   |
| 1.34  | Vasospasm up vs No vasospasm   |
| 1.48  | Vasospasm up vs No vasospasm   |
| 1.80  | Vasospasm up vs No vasospasm   |
| -1.27 | Vasospasm down vs No vasospasm |
| -1.52 | Vasospasm down vs No vasospasm |

|       |                                |
|-------|--------------------------------|
| 1.50  | Vasospasm up vs No vasospasm   |
| -1.35 | Vasospasm down vs No vasospasm |
| -1.38 | Vasospasm down vs No vasospasm |
| 1.42  | Vasospasm up vs No vasospasm   |
| -1.26 | Vasospasm down vs No vasospasm |
| -1.33 | Vasospasm down vs No vasospasm |
| 1.23  | Vasospasm up vs No vasospasm   |
| 1.40  | Vasospasm up vs No vasospasm   |
| 1.39  | Vasospasm up vs No vasospasm   |
| -1.24 | Vasospasm down vs No vasospasm |
| -1.36 | Vasospasm down vs No vasospasm |
| 1.32  | Vasospasm up vs No vasospasm   |
| -1.41 | Vasospasm down vs No vasospasm |
| 1.87  | Vasospasm up vs No vasospasm   |
| 1.36  | Vasospasm up vs No vasospasm   |
| -1.22 | Vasospasm down vs No vasospasm |
| -1.34 | Vasospasm down vs No vasospasm |
| -1.26 | Vasospasm down vs No vasospasm |
| 1.54  | Vasospasm up vs No vasospasm   |
| -1.23 | Vasospasm down vs No vasospasm |
| -1.37 | Vasospasm down vs No vasospasm |
| -1.32 | Vasospasm down vs No vasospasm |
| 1.55  | Vasospasm up vs No vasospasm   |
| -1.44 | Vasospasm down vs No vasospasm |
| 1.43  | Vasospasm up vs No vasospasm   |
| -1.32 | Vasospasm down vs No vasospasm |
| 1.56  | Vasospasm up vs No vasospasm   |
| -1.38 | Vasospasm down vs No vasospasm |
| 1.78  | Vasospasm up vs No vasospasm   |
| -1.26 | Vasospasm down vs No vasospasm |
| -1.41 | Vasospasm down vs No vasospasm |
| -1.23 | Vasospasm down vs No vasospasm |
| -1.35 | Vasospasm down vs No vasospasm |
| 1.74  | Vasospasm up vs No vasospasm   |
| 1.53  | Vasospasm up vs No vasospasm   |
| -1.21 | Vasospasm down vs No vasospasm |
| -1.20 | Vasospasm down vs No vasospasm |
| 1.42  | Vasospasm up vs No vasospasm   |
| -1.37 | Vasospasm down vs No vasospasm |
| 1.35  | Vasospasm up vs No vasospasm   |
| -1.22 | Vasospasm down vs No vasospasm |
| -1.30 | Vasospasm down vs No vasospasm |
| -1.44 | Vasospasm down vs No vasospasm |
| -1.30 | Vasospasm down vs No vasospasm |
| -1.40 | Vasospasm down vs No vasospasm |
| -1.23 | Vasospasm down vs No vasospasm |
| -1.25 | Vasospasm down vs No vasospasm |



|       |                                |
|-------|--------------------------------|
| -1.37 | Vasospasm down vs No vasospasm |
| -1.52 | Vasospasm down vs No vasospasm |
| -1.42 | Vasospasm down vs No vasospasm |
| -1.60 | Vasospasm down vs No vasospasm |
| 1.33  | Vasospasm up vs No vasospasm   |
| -1.36 | Vasospasm down vs No vasospasm |
| 1.65  | Vasospasm up vs No vasospasm   |
| -1.33 | Vasospasm down vs No vasospasm |
| -1.23 | Vasospasm down vs No vasospasm |
| 1.50  | Vasospasm up vs No vasospasm   |
| -1.27 | Vasospasm down vs No vasospasm |
| 1.72  | Vasospasm up vs No vasospasm   |
| 1.40  | Vasospasm up vs No vasospasm   |
| -1.49 | Vasospasm down vs No vasospasm |
| -1.40 | Vasospasm down vs No vasospasm |
| 2.02  | Vasospasm up vs No vasospasm   |
| 1.36  | Vasospasm up vs No vasospasm   |
| 1.26  | Vasospasm up vs No vasospasm   |
| 1.44  | Vasospasm up vs No vasospasm   |
| -1.28 | Vasospasm down vs No vasospasm |
| 1.60  | Vasospasm up vs No vasospasm   |
| -1.26 | Vasospasm down vs No vasospasm |
| -1.29 | Vasospasm down vs No vasospasm |
| -1.20 | Vasospasm down vs No vasospasm |
| 1.47  | Vasospasm up vs No vasospasm   |
| -1.57 | Vasospasm down vs No vasospasm |
| 1.53  | Vasospasm up vs No vasospasm   |
| -1.34 | Vasospasm down vs No vasospasm |
| 1.24  | Vasospasm up vs No vasospasm   |
| -1.42 | Vasospasm down vs No vasospasm |
| 1.60  | Vasospasm up vs No vasospasm   |
| -1.35 | Vasospasm down vs No vasospasm |
| 1.51  | Vasospasm up vs No vasospasm   |
| -1.32 | Vasospasm down vs No vasospasm |
| 1.22  | Vasospasm up vs No vasospasm   |
| -1.33 | Vasospasm down vs No vasospasm |
| -1.38 | Vasospasm down vs No vasospasm |
| -1.36 | Vasospasm down vs No vasospasm |
| -1.22 | Vasospasm down vs No vasospasm |
| 1.34  | Vasospasm up vs No vasospasm   |
| 1.52  | Vasospasm up vs No vasospasm   |
| -1.34 | Vasospasm down vs No vasospasm |
| 1.31  | Vasospasm up vs No vasospasm   |
| 1.30  | Vasospasm up vs No vasospasm   |
| -1.30 | Vasospasm down vs No vasospasm |
| 1.48  | Vasospasm up vs No vasospasm   |
| -1.42 | Vasospasm down vs No vasospasm |

|       |                                |
|-------|--------------------------------|
| 1.43  | Vasospasm up vs No vasospasm   |
| -1.49 | Vasospasm down vs No vasospasm |
| -1.66 | Vasospasm down vs No vasospasm |
| -1.32 | Vasospasm down vs No vasospasm |
| -1.29 | Vasospasm down vs No vasospasm |
| -1.22 | Vasospasm down vs No vasospasm |
| -1.37 | Vasospasm down vs No vasospasm |
| -1.46 | Vasospasm down vs No vasospasm |
| 1.47  | Vasospasm up vs No vasospasm   |
| -1.27 | Vasospasm down vs No vasospasm |
| 1.32  | Vasospasm up vs No vasospasm   |
| 1.46  | Vasospasm up vs No vasospasm   |
| -1.26 | Vasospasm down vs No vasospasm |
| -1.34 | Vasospasm down vs No vasospasm |
| -1.20 | Vasospasm down vs No vasospasm |
| -1.39 | Vasospasm down vs No vasospasm |
| 1.35  | Vasospasm up vs No vasospasm   |
| -1.58 | Vasospasm down vs No vasospasm |
| -1.34 | Vasospasm down vs No vasospasm |
| -1.32 | Vasospasm down vs No vasospasm |
| -1.28 | Vasospasm down vs No vasospasm |
| -1.40 | Vasospasm down vs No vasospasm |
| -1.31 | Vasospasm down vs No vasospasm |
| -1.38 | Vasospasm down vs No vasospasm |
| 1.40  | Vasospasm up vs No vasospasm   |
| 1.36  | Vasospasm up vs No vasospasm   |
| -1.40 | Vasospasm down vs No vasospasm |
| -1.23 | Vasospasm down vs No vasospasm |
| 1.52  | Vasospasm up vs No vasospasm   |
| 1.32  | Vasospasm up vs No vasospasm   |
| -1.29 | Vasospasm down vs No vasospasm |
| 1.28  | Vasospasm up vs No vasospasm   |
| 1.34  | Vasospasm up vs No vasospasm   |
| -1.21 | Vasospasm down vs No vasospasm |
| 1.98  | Vasospasm up vs No vasospasm   |
| 1.27  | Vasospasm up vs No vasospasm   |
| -1.26 | Vasospasm down vs No vasospasm |
| -1.23 | Vasospasm down vs No vasospasm |
| 1.33  | Vasospasm up vs No vasospasm   |
| -1.26 | Vasospasm down vs No vasospasm |
| -1.48 | Vasospasm down vs No vasospasm |
| -1.31 | Vasospasm down vs No vasospasm |
| 1.66  | Vasospasm up vs No vasospasm   |
| 1.23  | Vasospasm up vs No vasospasm   |
| -1.27 | Vasospasm down vs No vasospasm |
| 1.42  | Vasospasm up vs No vasospasm   |
| 1.26  | Vasospasm up vs No vasospasm   |

|       |                                |
|-------|--------------------------------|
| -1.35 | Vasospasm down vs No vasospasm |
| 1.43  | Vasospasm up vs No vasospasm   |
| 1.78  | Vasospasm up vs No vasospasm   |
| -1.35 | Vasospasm down vs No vasospasm |
| -1.26 | Vasospasm down vs No vasospasm |
| -1.22 | Vasospasm down vs No vasospasm |
| -1.53 | Vasospasm down vs No vasospasm |
| -1.29 | Vasospasm down vs No vasospasm |
| 1.58  | Vasospasm up vs No vasospasm   |
| -1.33 | Vasospasm down vs No vasospasm |
| -1.32 | Vasospasm down vs No vasospasm |
| 1.44  | Vasospasm up vs No vasospasm   |
| 1.31  | Vasospasm up vs No vasospasm   |
| -1.51 | Vasospasm down vs No vasospasm |
| 1.41  | Vasospasm up vs No vasospasm   |
| 1.44  | Vasospasm up vs No vasospasm   |
| -1.38 | Vasospasm down vs No vasospasm |
| -1.28 | Vasospasm down vs No vasospasm |
| 1.37  | Vasospasm up vs No vasospasm   |
| 1.48  | Vasospasm up vs No vasospasm   |
| -1.30 | Vasospasm down vs No vasospasm |
| 1.28  | Vasospasm up vs No vasospasm   |
| 1.32  | Vasospasm up vs No vasospasm   |
| -1.29 | Vasospasm down vs No vasospasm |
| -1.33 | Vasospasm down vs No vasospasm |
| -1.50 | Vasospasm down vs No vasospasm |
| -1.42 | Vasospasm down vs No vasospasm |
| -1.30 | Vasospasm down vs No vasospasm |
| 1.52  | Vasospasm up vs No vasospasm   |
| -1.21 | Vasospasm down vs No vasospasm |
| -1.28 | Vasospasm down vs No vasospasm |
| -1.43 | Vasospasm down vs No vasospasm |
| 1.60  | Vasospasm up vs No vasospasm   |
| -1.27 | Vasospasm down vs No vasospasm |
| -1.26 | Vasospasm down vs No vasospasm |
| 1.51  | Vasospasm up vs No vasospasm   |
| 1.40  | Vasospasm up vs No vasospasm   |
| -1.25 | Vasospasm down vs No vasospasm |
| -1.29 | Vasospasm down vs No vasospasm |
| 1.47  | Vasospasm up vs No vasospasm   |
| -1.25 | Vasospasm down vs No vasospasm |
| 1.36  | Vasospasm up vs No vasospasm   |
| -1.29 | Vasospasm down vs No vasospasm |
| 1.75  | Vasospasm up vs No vasospasm   |
| -1.21 | Vasospasm down vs No vasospasm |
| -1.40 | Vasospasm down vs No vasospasm |
| -1.23 | Vasospasm down vs No vasospasm |

|       |                                |
|-------|--------------------------------|
| 1.43  | Vasospasm up vs No vasospasm   |
| -1.30 | Vasospasm down vs No vasospasm |
| -1.32 | Vasospasm down vs No vasospasm |
| -1.62 | Vasospasm down vs No vasospasm |
| 1.26  | Vasospasm up vs No vasospasm   |
| 1.44  | Vasospasm up vs No vasospasm   |
| -1.75 | Vasospasm down vs No vasospasm |
| -1.52 | Vasospasm down vs No vasospasm |
| 1.38  | Vasospasm up vs No vasospasm   |
| -1.41 | Vasospasm down vs No vasospasm |
| 1.36  | Vasospasm up vs No vasospasm   |
| 1.54  | Vasospasm up vs No vasospasm   |
| 1.31  | Vasospasm up vs No vasospasm   |
| -1.28 | Vasospasm down vs No vasospasm |
| 1.36  | Vasospasm up vs No vasospasm   |
| 1.65  | Vasospasm up vs No vasospasm   |
| -1.29 | Vasospasm down vs No vasospasm |
| 1.30  | Vasospasm up vs No vasospasm   |
| 1.20  | Vasospasm up vs No vasospasm   |
| 1.45  | Vasospasm up vs No vasospasm   |
| -1.24 | Vasospasm down vs No vasospasm |
| -1.27 | Vasospasm down vs No vasospasm |
| 1.54  | Vasospasm up vs No vasospasm   |
| -1.51 | Vasospasm down vs No vasospasm |
| 2.12  | Vasospasm up vs No vasospasm   |
| -1.25 | Vasospasm down vs No vasospasm |
| 1.47  | Vasospasm up vs No vasospasm   |
| 1.20  | Vasospasm up vs No vasospasm   |
| -1.52 | Vasospasm down vs No vasospasm |
| -1.47 | Vasospasm down vs No vasospasm |
| -1.46 | Vasospasm down vs No vasospasm |
| -1.52 | Vasospasm down vs No vasospasm |
| 1.31  | Vasospasm up vs No vasospasm   |
| -1.30 | Vasospasm down vs No vasospasm |
| 1.77  | Vasospasm up vs No vasospasm   |
| -1.41 | Vasospasm down vs No vasospasm |
